# Supplementary material for: Quantitative heterodonty in Crocodylia: assessing size and shape across modern and extinct taxa
Source: PeerJ. 2019 Feb 28;7:e6485. doi: 10.7717/peerj.6485 (PMC6397764; doi:10.7717/peerj.6485)
Supplement: Supplemental Information 2 — Raw data of each specimen and each tooth in an Excel spreadsheet with two tabs. [file peerj-07-6485-s002.xlsx]

## Sheet: Specimen data
Genus	Species	Collection	Number	Head Length	Size MD	Shape MD	PLS1 skull	PLS1 average tooth
Alligator	mississippiensis	ROM	4408	347.225	65.0002	0.0258257	0.107138	0.0514175
Alligator	mississippiensis	AMNH	71621	409.675	86.1845	0.020472	0.0588689	0.0548987
Alligator	prenasalis	ROM	1375	317.193	21.5833	0.00928416	0.145312	0.213559
Alligator	sinensis	AMNH	23900	158.995	10.3914	0.0239361	0.0722051	0.0620192
Alligator	sinensis	AMNH	23907	142.255	6.69278	0.0170587	0.0739125	0.0658137
Borealosuchus	sternbergiii	UCMP	126099	210.779	30.4942	0.0198936	-0.0204965	-0.0460383
Borealosuchus	sternbergiii	UCMP	131769	N/A	105.378	0.0156592	N/A	N/A
Brachychampsa	sp.	ROM	68491	504.403	127.554	0.01222	0.074112	0.245476
Caiman	crocodilus	ROM	7714	218.398	38.8026	0.0168458	0.0789267	-0.0332525
Caiman	crocodilus	ROM	7719	219.978	43.8264	0.0195971	0.0689854	-0.00716464
Caiman	sclerops	UCMP	42844	305.05	87.8492	0.0200261	-0.0293599	0.0321195
Caiman	yacare	AMNH	97297	208.016	35.8982	0.030062	0.0271999	0.0137562
Caiman	yacare	AMNH	97300	346.47	123.328	0.0214345	0.0679672	-0.0427609
Crocodylus	acutus	AMNH	7856	492.144	123.532	0.0204345	-0.0385028	-0.0346582
Crocodylus	acutus	AMNH	7857	426.556	129.526	0.0247889	-0.0533166	-0.0538393
Crocodylus	affinis	UCMP	131090	542.872	105.213	0.0161512	0.0672626	0.170171
Crocodylus	niloticus	AMNH	23471	649.824	263.156	0.0139124	-0.0433662	-0.0252609
Crocodylus	niloticus	AMNH	142494	N/A	141.161	0.0271714	N/A	N/A
Crocodylus	palustris	AMNH	75707	400.114	100.461	0.0209789	0.0225422	0.00137081
Crocodylus	palustris	AMNH	96134	241.553	20.1812	0.021879	0.0414228	-0.0143842
Crocodylus	porosus	AMNH	66639	421.366	128.21	0.0179594	-0.0697572	-0.0817951
Crocodylus	porosus	AMNH	94957	590.619	382.083	0.0176509	-0.0380146	-0.0246261
Crocodylus	siamensis	AMNH	49231	376.539	72.1037	0.033666	-0.0584856	0.00811361
Crocodylus	siamensis	AMNH	72640	247.697	25.7947	0.027892	-0.0545151	-0.0395332
Gavialis	gangeticus	AMNH	131377	432.358	42.8939	0.0111789	-0.263227	-0.275436
Hamadasuchus	rebouli	ROM	52620	382.075	153.087	0.0230016	-0.0818091	0.00128465
Leidyosuchus	canadensis	ROM	1903	433.696	157.376	0.0158434	0.0358263	-0.0281911
Mecistops	cataphractus	AMNH	107634	336.373	38.3779	0.0137309	-0.175237	-0.145235
Osteolaemus	tetraspis	AMNH	117801	201.999	50.0967	0.0295141	0.131018	0.0301095
Osteolaemus	tetraspis	AMNH	117802	150.845	12.3738	0.0328876	0.075943	0.040818
Paleosuchus	palpebrosus	AMNH	93812	160.359	20.0759	0.0209509	0.0717891	0.00841427
Paleosuchus	palpebrosus	AMNH	97328	213.843	50.606	0.0237781	0.00154895	0.00974666
Paleosuchus	trigonatus	AMNH	58136	230.507	47.506	0.028889	-0.0126715	0.00304757
Paleosuchus	trigonatus	AMNH	137174	191.548	19.7722	0.0161396	-0.0667916	0.00683631
Tomistoma	schlegelii	AMNH	113078	436.709	66.2717	0.0181098	-0.21643	-0.166797

## Sheet: Tooth data
Genus	Species	Collection	Number	Bone	Position	Side	Centroid size	PC1	PC2	PC3	Regression score
Alligator	mississippiensis	AMNH	71621	Premaxilla	1	Right	20.0347	-0.0552936	0.0305939	0.00943458	0.0573822
Alligator	mississippiensis	AMNH	71621	Premaxilla	2	Right	21.3413	-0.0705137	0.0328331	-0.0256234	0.0705363
Alligator	mississippiensis	AMNH	71621	Premaxilla	5	Right	26.9803	-0.0562218	0.00154607	-0.00862708	0.0575252
Alligator	mississippiensis	AMNH	71621	Maxilla	1	Left	24.9559	-0.0655273	-0.029432	0.011534	0.0622147
Alligator	mississippiensis	AMNH	71621	Maxilla	2	Left	31.9283	0.0156819	-0.0258829	-0.0142708	-0.0147854
Alligator	mississippiensis	AMNH	71621	Maxilla	3	Right	38.6463	0.00988665	-0.0636226	0.0118718	-0.0107567
Alligator	mississippiensis	AMNH	71621	Maxilla	4	Left	61.1614	-0.062373	-0.0173527	-0.0139032	0.0626747
Alligator	mississippiensis	AMNH	71621	Maxilla	5	Right	31.1675	0.0104553	-0.033899	0.0269565	-0.0121483
Alligator	mississippiensis	AMNH	71621	Maxilla	6	Right	24.5708	0.022065	-0.0301346	0.036742	-0.023507
Alligator	mississippiensis	AMNH	71621	Maxilla	7	Left	22.6224	0.027842	0.00525841	0.0325671	-0.0281392
Alligator	mississippiensis	AMNH	71621	Maxilla	8	Both	24.6899	0.118514	-0.0155963	0.0132843	-0.118322
Alligator	mississippiensis	AMNH	71621	Maxilla	9	Both	27.0177	0.111429	-0.00251069	0.0259807	-0.111406
Alligator	mississippiensis	AMNH	71621	Maxilla	10	Both	34.1826	0.126065	-0.0114782	0.0312716	-0.125385
Alligator	mississippiensis	AMNH	71621	Maxilla	11	Both	37.3203	0.137438	-0.00699491	0.00705826	-0.13592
Alligator	mississippiensis	AMNH	71621	Maxilla	12	Right	26.9734	0.280338	0.00474561	0.0226131	-0.278473
Alligator	mississippiensis	AMNH	71621	Maxilla	13	Left	20.8411	0.263574	0.0311593	-0.00180535	-0.260724
Alligator	mississippiensis	AMNH	71621	Maxilla	15	Right	16.0048	0.26475	-0.0315743	0.0242513	-0.265569
Alligator	mississippiensis	AMNH	71621	Dentary	1	Left	37.714	-0.0761488	-0.033876	-0.00570869	0.0754954
Alligator	mississippiensis	AMNH	71621	Dentary	2	Left	26.5399	-0.110275	0.0105439	0.00955967	0.110214
Alligator	mississippiensis	AMNH	71621	Dentary	3	Both	26.6611	-0.0790359	-0.019869	-0.00371287	0.0781753
Alligator	mississippiensis	AMNH	71621	Dentary	4	Left	40.5154	-0.0897086	-0.00508629	0.0374911	0.0901006
Alligator	mississippiensis	AMNH	71621	Dentary	6	Left	19.8502	-0.0632568	-0.0482102	0.0244102	0.0600105
Alligator	mississippiensis	AMNH	71621	Dentary	7	Both	17.8035	0.012139	-0.0182787	0.0022007	-0.0136293
Alligator	mississippiensis	AMNH	71621	Dentary	8	Left	17.7345	0.000992869	-0.0315568	0.0220721	-0.00484026
Alligator	mississippiensis	AMNH	71621	Dentary	9	Right	17.8399	-0.0788304	-0.0198708	-0.00828511	0.0758641
Alligator	mississippiensis	AMNH	71621	Dentary	10	Left	17.4586	0.0521839	-0.0200427	0.00815136	-0.0532626
Alligator	mississippiensis	AMNH	71621	Dentary	11	Left	19.0093	0.0618013	-0.0239781	0.00062858	-0.0632042
Alligator	mississippiensis	AMNH	71621	Dentary	13	Both	36.8882	0.024222	-0.0612165	0.0227762	-0.0251676
Alligator	mississippiensis	AMNH	71621	Dentary	14	Right	39.1935	0.073951	-0.0048355	-0.0149081	-0.0716684
Alligator	mississippiensis	AMNH	71621	Dentary	15	Both	26.3384	0.17315	-0.00372733	0.0170578	-0.17115
Alligator	mississippiensis	AMNH	71621	Dentary	16	Both	23.4441	0.252972	-0.0046886	0.00115944	-0.25156
Alligator	mississippiensis	AMNH	71621	Dentary	17	Both	22.7231	0.270402	-0.0137612	-0.0244263	-0.270206
Alligator	mississippiensis	AMNH	71621	Dentary	18	Both	21.4081	0.278766	0.000127123	0.00457953	-0.277137
Alligator	mississippiensis	AMNH	71621	Dentary	19	Both	20.0917	0.276753	-0.00786263	-0.00535217	-0.276674
Alligator	mississippiensis	AMNH	71621	Dentary	20	Both	20.7405	0.272079	-0.0206748	-0.0132642	-0.272752
Alligator	mississippiensis	ROM	4408	Premaxilla	1	Both	25.2283	-0.0831081	0.000537519	-0.0180142	0.0824105
Alligator	mississippiensis	ROM	4408	Premaxilla	2	Left	24.055	-0.0152592	-0.0156205	0.000138002	0.0144958
Alligator	mississippiensis	ROM	4408	Premaxilla	3	Both	37.8513	-0.108499	-0.00314868	-0.0220706	0.107964
Alligator	mississippiensis	ROM	4408	Premaxilla	4	Both	39.8681	-0.0875961	-0.0137627	-0.00866561	0.0867466
Alligator	mississippiensis	ROM	4408	Premaxilla	5	Left	30.4158	-0.106786	0.00611834	0.000521492	0.106483
Alligator	mississippiensis	ROM	4408	Maxilla	2	Both	37.5386	-0.0616754	0.0232803	-0.00777967	0.0617284
Alligator	mississippiensis	ROM	4408	Maxilla	3	Both	40.1062	-0.040918	-0.00497806	-0.00095028	0.0412169
Alligator	mississippiensis	ROM	4408	Maxilla	4	Left	44.972	-0.0896267	0.0122066	-0.00373887	0.0900596
Alligator	mississippiensis	ROM	4408	Maxilla	5	Left	40.5205	-0.0419432	0.0230371	0.0032045	0.0425211
Alligator	mississippiensis	ROM	4408	Maxilla	6	Left	27.3611	0.00248788	0.0539149	0.00414256	-0.00016546
Alligator	mississippiensis	ROM	4408	Maxilla	8	Both	24.1991	0.0877344	-0.00300856	-0.00254621	-0.0873769
Alligator	mississippiensis	ROM	4408	Maxilla	10	Right	31.1169	0.123846	-0.0232836	-0.0036715	-0.123289
Alligator	mississippiensis	ROM	4408	Maxilla	11	Right	34.4734	0.0876257	0.00702414	-0.0021142	-0.0859964
Alligator	mississippiensis	ROM	4408	Maxilla	12	Right	28.4188	0.225121	-0.0306889	0.0148748	-0.224172
Alligator	mississippiensis	ROM	4408	Maxilla	13	Right	22.8255	0.209505	0.00769497	-0.00549757	-0.208744
Alligator	mississippiensis	ROM	4408	Maxilla	14	Left	22.6531	0.282241	-0.0234902	-0.0207238	-0.280952
Alligator	mississippiensis	ROM	4408	Maxilla	15	Right	17.6181	0.280251	0.00725921	-0.0247398	-0.279065
Alligator	mississippiensis	ROM	4408	Dentary	1	Left	38.6444	-0.109684	-0.0477785	-0.0125851	0.108149
Alligator	mississippiensis	ROM	4408	Dentary	2	Both	25.9742	-0.00787337	0.0110029	-0.012636	0.00778965
Alligator	mississippiensis	ROM	4408	Dentary	4	Right	42.0361	-0.12959	0.026653	-0.0116392	0.129797
Alligator	mississippiensis	ROM	4408	Dentary	5	Left	28.1156	-0.14249	0.0361229	-0.000875645	0.144105
Alligator	mississippiensis	ROM	4408	Dentary	7	Left	14.7876	0.0347053	-0.00274266	-0.0210954	-0.0336038
Alligator	mississippiensis	ROM	4408	Dentary	10	Right	18.707	0.0700238	0.00458814	-0.00928603	-0.0692844
Alligator	mississippiensis	ROM	4408	Dentary	11	Left	28.4561	0.0507762	0.0101424	0.0209409	-0.0504085
Alligator	mississippiensis	ROM	4408	Dentary	12	Right	35.8905	0.0173555	0.0184885	-0.00543568	-0.0162831
Alligator	mississippiensis	ROM	4408	Dentary	13	Left	34.6595	0.0692223	-0.0157205	0.00769716	-0.0689777
Alligator	mississippiensis	ROM	4408	Dentary	14	Both	24.9308	0.237024	-0.00340379	0.00843465	-0.236745
Alligator	mississippiensis	ROM	4408	Dentary	15	Right	21.8889	0.287095	0.0146687	0.00944683	-0.282333
Alligator	mississippiensis	ROM	4408	Dentary	16	Left	22.9201	0.298248	0.00961635	-0.000856415	-0.295463
Alligator	mississippiensis	ROM	4408	Dentary	17	Left	21.9863	0.283062	0.0162151	-0.0288805	-0.280657
Alligator	mississippiensis	ROM	4408	Dentary	18	Left	21.9022	0.303409	-0.00228287	-0.0157029	-0.300032
Alligator	prenasalis	ROM	1375	Premaxilla	3	Right	23.3597	0.0956286	-0.0330681	0.0123574	-0.0934086
Alligator	prenasalis	ROM	1375	Premaxilla	4	Right	34.0541	0.118758	0.0336674	0.0239618	-0.112985
Alligator	prenasalis	ROM	1375	Maxilla	5	Right	25.4753	0.230011	-0.0050872	0.0130141	-0.224614
Alligator	prenasalis	ROM	1375	Maxilla	7	Right	17.503	0.253835	-0.0318853	0.00232039	-0.251979
Alligator	prenasalis	ROM	1375	Maxilla	8	Right	25.5016	0.283258	0.0155352	0.0487075	-0.27689
Alligator	prenasalis	ROM	1375	Maxilla	9	Right	28.3229	0.224059	-0.00600047	-0.0124689	-0.219358
Alligator	prenasalis	ROM	1375	Maxilla	10	Left	24.3965	0.27433	0.00866496	0.0246755	-0.269874
Alligator	prenasalis	ROM	1375	Maxilla	11	Right	25.9858	0.311148	0.0125311	0.033247	-0.304472
Alligator	sinensis	AMNH	23900	Premaxilla	1	Both	7.86322	-0.0630668	0.0212156	0.00313331	0.0607916
Alligator	sinensis	AMNH	23900	Premaxilla	2	Right	9.14909	-0.0380699	-0.0117246	-0.00562603	0.0337336
Alligator	sinensis	AMNH	23900	Premaxilla	3	Right	12.7402	-0.0727483	-0.0135166	-0.00339192	0.0702942
Alligator	sinensis	AMNH	23900	Premaxilla	4	Right	17.8852	-0.0957527	-0.0630025	-0.0033056	0.0909423
Alligator	sinensis	AMNH	23900	Maxilla	1	Both	10.1453	0.0240785	-0.0172323	-7.99258e-05	-0.0271242
Alligator	sinensis	AMNH	23900	Maxilla	2	Both	13.3314	-0.0101523	-0.0308818	0.0114234	0.00621399
Alligator	sinensis	AMNH	23900	Maxilla	3	Both	15.6383	-0.0253663	-0.0541491	0.0126085	0.0236557
Alligator	sinensis	AMNH	23900	Maxilla	4	Right	22.8422	-0.0838628	-0.0509842	0.00166914	0.081243
Alligator	sinensis	AMNH	23900	Maxilla	5	Left	12.1567	0.0737175	-0.0331499	-0.0203605	-0.0761738
Alligator	sinensis	AMNH	23900	Maxilla	6	Right	10.375	0.0970414	-0.0241199	-0.0116802	-0.0991469
Alligator	sinensis	AMNH	23900	Maxilla	7	Left	11.3396	0.163605	0.0320812	-0.0208625	-0.163057
Alligator	sinensis	AMNH	23900	Maxilla	9	Right	10.9701	0.150266	-0.00330829	0.0308177	-0.1493
Alligator	sinensis	AMNH	23900	Maxilla	11	Right	13.1631	0.290402	-0.0200874	-0.0585751	-0.289815
Alligator	sinensis	AMNH	23900	Maxilla	12	Both	12.2859	0.320274	-0.0204176	-0.0106266	-0.31865
Alligator	sinensis	AMNH	23900	Maxilla	13	Right	11.6609	0.294184	0.00970119	-0.0467898	-0.292416
Alligator	sinensis	AMNH	23900	Dentary	1	Both	16.0673	-0.0890998	0.0161682	0.00996308	0.0886533
Alligator	sinensis	AMNH	23900	Dentary	2	Right	11.3417	-0.0741825	-0.0259489	0.00671502	0.0713593
Alligator	sinensis	AMNH	23900	Dentary	4	Left	15.6826	-0.0661656	0.0459091	0.00403466	0.0673267
Alligator	sinensis	AMNH	23900	Dentary	5	Right	11.1264	-0.0491702	0.00446871	0.0286186	0.0462729
Alligator	sinensis	AMNH	23900	Dentary	6	Right	9.21777	0.00325825	0.042194	0.0285236	-0.00405398
Alligator	sinensis	AMNH	23900	Dentary	7	Left	8.96294	0.0790804	0.00392932	-0.000473164	-0.0795836
Alligator	sinensis	AMNH	23900	Dentary	8	Both	8.65595	0.0778241	-0.00260505	0.0260886	-0.079114
Alligator	sinensis	AMNH	23900	Dentary	9	Both	9.04214	0.0317876	-0.00148017	0.0219971	-0.0347111
Alligator	sinensis	AMNH	23900	Dentary	11	Left	11.2148	0.0566518	-0.0212581	-0.00245493	-0.0603627
Alligator	sinensis	AMNH	23900	Dentary	13	Right	15.0593	0.0621168	-0.00735754	-0.0146025	-0.062491
Alligator	sinensis	AMNH	23900	Dentary	14	Right	14.3606	0.13324	-0.0193168	-0.0133908	-0.136692
Alligator	sinensis	AMNH	23900	Dentary	16	Right	15.1072	0.283142	0.019052	-0.0189572	-0.279079
Alligator	sinensis	AMNH	23900	Dentary	18	Right	13.2782	0.315166	0.0296955	-0.0453981	-0.313403
Alligator	sinensis	AMNH	23900	Dentary	19	Both	11.2921	0.306521	-0.0122113	-0.0654097	-0.306032
Alligator	sinensis	AMNH	23907	Premaxilla	2	Right	15.2926	-0.0822361	-0.0295331	-0.00532278	0.0782847
Alligator	sinensis	AMNH	23907	Premaxilla	3	Right	9.30548	-0.00844972	-0.029946	-0.0115216	0.00465118
Alligator	sinensis	AMNH	23907	Premaxilla	4	Right	14.9249	-0.0595815	-0.0106535	0.0110442	0.0563571
Alligator	sinensis	AMNH	23907	Maxilla	1	Both	10.0384	-0.026869	0.0108901	-0.014518	0.0250953
Alligator	sinensis	AMNH	23907	Maxilla	2	Left	11.5759	-0.05999	0.00332606	-0.007443	0.0569337
Alligator	sinensis	AMNH	23907	Maxilla	3	Both	13.5007	-0.0488792	-0.0218307	-0.0132018	0.0456031
Alligator	sinensis	AMNH	23907	Maxilla	4	Left	19.6029	-0.0526904	0.0143079	0.0126666	0.0531943
Alligator	sinensis	AMNH	23907	Maxilla	5	Left	13.0916	0.0835522	0.0266939	-0.0153658	-0.0823939
Alligator	sinensis	AMNH	23907	Maxilla	6	Right	10.4793	0.106808	0.0013897	-0.0484579	-0.108789
Alligator	sinensis	AMNH	23907	Maxilla	8	Right	11.8061	0.106013	0.0326427	-0.0149198	-0.10882
Alligator	sinensis	AMNH	23907	Maxilla	9	Left	11.748	0.154594	-0.00355934	-0.0155359	-0.156712
Alligator	sinensis	AMNH	23907	Maxilla	10	Right	13.0545	0.158229	-0.00024375	-0.0339774	-0.159908
Alligator	sinensis	AMNH	23907	Maxilla	11	Both	12.7536	0.255323	0.0125347	-0.0874182	-0.255716
Alligator	sinensis	AMNH	23907	Maxilla	13	Right	11.1908	0.274126	-0.0223853	-0.0904702	-0.274549
Alligator	sinensis	AMNH	23907	Maxilla	14	Left	7.96628	0.288221	0.000489184	-0.0681241	-0.291005
Alligator	sinensis	AMNH	23907	Dentary	1	Left	12.3414	-0.0268057	-0.0561321	-0.00463198	0.0244346
Alligator	sinensis	AMNH	23907	Dentary	2	Both	11.2199	-0.0513132	0.0122509	0.0191217	0.0497369
Alligator	sinensis	AMNH	23907	Dentary	3	Left	10.4069	-0.100823	0.0016375	0.00127237	0.0977615
Alligator	sinensis	AMNH	23907	Dentary	5	Both	8.76336	0.0883834	-0.0142694	-0.0113339	-0.0893136
Alligator	sinensis	AMNH	23907	Dentary	6	Left	8.92442	0.042714	-0.0067652	0.0059445	-0.0451466
Alligator	sinensis	AMNH	23907	Dentary	7	Left	8.22312	0.0266376	-0.0336624	0.0125331	-0.0308494
Alligator	sinensis	AMNH	23907	Dentary	8	Right	7.72498	0.110658	-0.0210646	-0.0132966	-0.11185
Alligator	sinensis	AMNH	23907	Dentary	9	Both	7.9361	0.0765354	0.00123064	0.0106317	-0.0790017
Alligator	sinensis	AMNH	23907	Dentary	10	Both	8.07925	0.0990872	0.022312	-0.00100565	-0.100321
Alligator	sinensis	AMNH	23907	Dentary	11	Right	9.65082	0.0518841	0.00139324	0.0299469	-0.0532782
Alligator	sinensis	AMNH	23907	Dentary	12	Both	12.2414	0.0708879	0.029301	-0.0173508	-0.0696696
Alligator	sinensis	AMNH	23907	Dentary	14	Both	12.3532	0.136888	0.00881557	0.0086306	-0.139553
Alligator	sinensis	AMNH	23907	Dentary	15	Both	11.5661	0.187974	0.024406	-0.00400757	-0.189603
Alligator	sinensis	AMNH	23907	Dentary	16	Both	10.6714	0.236594	0.011055	-0.0565209	-0.235733
Alligator	sinensis	AMNH	23907	Dentary	18	Right	12.6568	0.285885	0.010681	-0.0790043	-0.285677
Borealosuchus	sternbergii	UCMP	126099	Maxilla	3	Left	20.3338	-0.0998658	0.0292396	-0.00975416	0.102287
Borealosuchus	sternbergii	UCMP	126099	Maxilla	4	Left	31.1206	-0.21564	0.0377225	-0.0186593	0.215747
Borealosuchus	sternbergii	UCMP	126099	Maxilla	6	Left	18.6653	-0.0958548	-0.0878877	0.026036	0.0919951
Borealosuchus	sternbergii	UCMP	126099	Maxilla	7	Left	16.7317	-0.0561889	-0.0349426	0.0287025	0.0570247
Borealosuchus	sternbergii	UCMP	126099	Maxilla	11	Left	17.5667	0.00689457	0.00238879	0.0316321	-0.0060697
Borealosuchus	sternbergii	UCMP	126099	Maxilla	14	Left	17.1045	0.0858765	-0.00699424	0.0108831	-0.0861298
Borealosuchus	sternbergii	UCMP	126099	Maxilla	16	Left	14.0673	0.163813	0.0156504	0.0120566	-0.161838
Borealosuchus	sternbergii	UCMP	131769	Dentary	2	Right	29.2572	-0.134852	-0.0525312	-0.00626192	0.130706
Borealosuchus	sternbergii	UCMP	131769	Dentary	3	Right	54.8972	-0.203614	-0.0340117	-0.0164575	0.201718
Borealosuchus	sternbergii	UCMP	131769	Dentary	4	Right	29.4561	-0.0997373	-0.0278345	0.00157702	0.10045
Borealosuchus	sternbergii	UCMP	131769	Dentary	8	Right	22.7309	-0.0601973	0.0310448	-0.000514086	0.0594105
Borealosuchus	sternbergii	UCMP	131769	Dentary	9	Right	23.0204	0.0452222	-0.0261296	-0.0286042	-0.0471823
Borealosuchus	sternbergii	UCMP	131769	Dentary	10	Right	16.1119	0.0491211	-0.0133127	-0.000781563	-0.0508803
Borealosuchus	sternbergii	UCMP	131769	Dentary	12	Right	38.927	0.0603624	0.0271611	-0.0138483	-0.0553154
Borealosuchus	sternbergii	UCMP	131769	Dentary	13	Right	37.1694	-0.00414494	0.0374066	-0.022366	0.00613635
Borealosuchus	sternbergii	UCMP	131769	Dentary	14	Right	35.9606	-0.0116773	0.0267556	0.015099	0.011962
Borealosuchus	sternbergii	UCMP	131769	Dentary	16	Right	30.5457	0.0952135	0.0467748	-0.0150911	-0.0896337
Borealosuchus	sternbergii	UCMP	131769	Dentary	18	Right	29.6105	0.190794	-0.0130693	-0.0453732	-0.185005
Brachychamsa	sp.	ROM	68491	Premaxilla	4	Left	53.8387	0.0999762	-0.0357105	0.0109975	-0.0982023
Brachychamsa	sp.	ROM	68491	Maxilla	2	Left	34.2134	0.203607	-0.0357282	0.00800492	-0.200748
Brachychamsa	sp.	ROM	68491	Maxilla	3	Left	41.785	0.151177	-0.0410156	0.0200705	-0.150813
Brachychamsa	sp.	ROM	68491	Maxilla	4	Left	47.5583	0.198982	-0.0182013	0.0188625	-0.195445
Brachychamsa	sp.	ROM	68491	Maxilla	5	Left	68.1585	0.209675	-0.0030424	0.0254194	-0.205257
Brachychamsa	sp.	ROM	68491	Maxilla	6	Left	41.3035	0.237405	-0.011734	0.0157249	-0.234165
Brachychamsa	sp.	ROM	68491	Maxilla	7	Left	32.2049	0.204772	0.00654115	-0.00470646	-0.203904
Brachychamsa	sp.	ROM	68491	Maxilla	8	Left	25.8699	0.228026	-0.0211831	-0.00846557	-0.228937
Brachychamsa	sp.	ROM	68491	Maxilla	11	Left	62.2522	0.277505	0.00476664	0.0430277	-0.273432
Brachychamsa	sp.	ROM	68491	Maxilla	12	Left	55.3025	0.353363	0.00147631	0.0372937	-0.347144
Brachychamsa	sp.	ROM	68491	Maxilla	13	Left	56.6369	0.356272	7.60292e-05	0.0173688	-0.350749
Brachychamsa	sp.	ROM	68491	Maxilla	14	Left	49.9486	0.371545	0.000469493	0.0215447	-0.366194
Brachychamsa	sp.	ROM	68491	Dentary	1	Right	43.7399	0.130233	-0.0578369	-0.0132783	-0.130714
Brachychamsa	sp.	ROM	68491	Dentary	2	Right	39.4475	0.175509	-0.00758543	-0.0164025	-0.172724
Brachychamsa	sp.	ROM	68491	Dentary	15	Left	67.5334	0.224073	-0.0351466	0.0303406	-0.222621
Brachychamsa	sp.	ROM	68491	Dentary	17	Left	44.4919	0.318057	0.004992	-0.0050296	-0.317549
Brachychamsa	sp.	ROM	68491	Dentary	18	Left	50.7809	0.359511	0.00534003	0.0398863	-0.355609
Brachychamsa	sp.	ROM	68491	Dentary	19	Left	51.7867	0.357452	-0.00074302	0.0139915	-0.352328
Brachychamsa	sp.	ROM	68491	Dentary	20	Left	47.1703	0.349743	-0.019487	0.0167687	-0.346268
Caiman	crocodilus	ROM	7714	Premaxilla	3	Left	24.27	-0.114034	-0.00241057	-0.0304957	0.1133
Caiman	crocodilus	ROM	7714	Premaxilla	4	Left	29.0622	-0.123484	0.0322664	-0.0303515	0.124955
Caiman	crocodilus	ROM	7714	Premaxilla	5	Left	15.0184	-0.113702	0.0489309	-0.0196603	0.114355
Caiman	crocodilus	ROM	7714	Maxilla	1	Right	17.7015	-0.166244	0.0169946	0.00637178	0.16439
Caiman	crocodilus	ROM	7714	Maxilla	2	Right	19.5408	-0.144412	-0.000739632	0.0111197	0.142321
Caiman	crocodilus	ROM	7714	Maxilla	3	Both	26.2805	-0.161823	0.00879162	0.00819181	0.16033
Caiman	crocodilus	ROM	7714	Maxilla	4	Both	32.0369	-0.147681	0.0325971	0.00377096	0.148778
Caiman	crocodilus	ROM	7714	Maxilla	5	Both	17.2787	-0.0974138	0.0167338	0.0213605	0.0974221
Caiman	crocodilus	ROM	7714	Maxilla	6	Left	14.4574	-0.08186	-0.0213849	0.0286273	0.0798042
Caiman	crocodilus	ROM	7714	Maxilla	7	Right	16.2233	0.00335252	0.00230828	0.0353957	-0.00219587
Caiman	crocodilus	ROM	7714	Maxilla	8	Right	19.0572	-0.0272369	0.0140633	0.0238928	0.0289864
Caiman	crocodilus	ROM	7714	Maxilla	9	Left	18.0013	0.0145547	-0.026734	0.0075747	-0.0160767
Caiman	crocodilus	ROM	7714	Maxilla	10	Both	15.2786	0.100077	0.00566368	-0.00271367	-0.0990237
Caiman	crocodilus	ROM	7714	Maxilla	11	Both	14.8794	0.147908	-0.0184086	-0.0092559	-0.148201
Caiman	crocodilus	ROM	7714	Maxilla	12	Both	13.6297	0.161828	-0.00323797	-0.016873	-0.160596
Caiman	crocodilus	ROM	7714	Maxilla	13	Right	11.6522	0.157134	-0.0139142	-0.0282603	-0.157437
Caiman	crocodilus	ROM	7714	Dentary	1	Right	32.4147	-0.113668	0.0399931	-0.0481838	0.115845
Caiman	crocodilus	ROM	7714	Dentary	3	Right	19.6553	-0.150004	0.0299025	0.00909895	0.151169
Caiman	crocodilus	ROM	7714	Dentary	4	Right	32.5794	-0.149889	0.0364544	-0.0145459	0.150472
Caiman	crocodilus	ROM	7714	Dentary	6	Right	13.5977	-0.109863	0.0218755	0.0196383	0.109032
Caiman	crocodilus	ROM	7714	Dentary	8	Right	10.4327	-0.0422065	0.0206044	0.0053067	0.04139
Caiman	crocodilus	ROM	7714	Dentary	10	Both	16.3643	-0.0966933	0.00778234	0.0229019	0.0956294
Caiman	crocodilus	ROM	7714	Dentary	11	Right	22.0632	-0.0855431	0.0248836	0.027001	0.0849727
Caiman	crocodilus	ROM	7714	Dentary	12	Right	22.0778	-0.0841097	0.0321839	0.0326267	0.0845463
Caiman	crocodilus	ROM	7714	Dentary	13	Right	16.4442	0.0374999	0.0321404	0.0430269	-0.0386764
Caiman	crocodilus	ROM	7714	Dentary	14	Right	15.4887	0.0342411	-0.00576622	0.0149097	-0.0347717
Caiman	crocodilus	ROM	7714	Dentary	15	Both	15.3032	0.0775063	0.00469331	0.0103136	-0.0761033
Caiman	crocodilus	ROM	7714	Dentary	16	Right	14.1646	0.166119	0.00925067	-0.00674882	-0.164854
Caiman	crocodilus	ROM	7714	Dentary	17	Both	14.4867	0.15691	0.00155741	-0.0021166	-0.155383
Caiman	crocodilus	ROM	7714	Dentary	18	Both	13.0588	0.175839	-0.00155521	0.000732254	-0.173913
Caiman	crocodilus	ROM	7714	Dentary	19	Right	11.8992	0.20158	0.00336228	0.0251472	-0.19705
Caiman	crocodilus	ROM	7719	Premaxilla	1	Left	15.7807	-0.171984	0.00793243	-0.0156923	0.172433
Caiman	crocodilus	ROM	7719	Premaxilla	4	Right	28.6113	-0.055349	0.0472591	-0.0388451	0.0600123
Caiman	crocodilus	ROM	7719	Premaxilla	5	Both	15.9407	-0.104892	0.091402	0.00359166	0.11025
Caiman	crocodilus	ROM	7719	Maxilla	1	Both	16.7758	-0.130353	0.037081	-0.00601861	0.131367
Caiman	crocodilus	ROM	7719	Maxilla	2	Both	19.0758	-0.146953	0.0051116	0.0113769	0.146342
Caiman	crocodilus	ROM	7719	Maxilla	3	Left	22.5179	-0.140366	-0.0378118	0.0110884	0.139003
Caiman	crocodilus	ROM	7719	Maxilla	4	Both	32.9836	-0.141601	-0.0256109	0.011094	0.140558
Caiman	crocodilus	ROM	7719	Maxilla	5	Both	18.6074	-0.0789076	0.00984919	0.0181637	0.0800262
Caiman	crocodilus	ROM	7719	Maxilla	6	Left	14.0908	-0.0526678	-0.0405915	0.0213324	0.0512618
Caiman	crocodilus	ROM	7719	Maxilla	7	Both	16.2559	0.0206584	-0.0441623	0.0260095	-0.0228229
Caiman	crocodilus	ROM	7719	Maxilla	8	Right	24.2804	-0.00869805	-0.00100007	0.0171041	0.00734481
Caiman	crocodilus	ROM	7719	Maxilla	9	Both	21.2124	0.0676204	-0.0208937	0.0107722	-0.0665304
Caiman	crocodilus	ROM	7719	Maxilla	10	Right	20.1313	0.130834	0.0117241	0.000648351	-0.130776
Caiman	crocodilus	ROM	7719	Maxilla	11	Both	18.7069	0.187531	-0.00647	-0.0124629	-0.185383
Caiman	crocodilus	ROM	7719	Maxilla	12	Both	16.8232	0.197139	-0.00238639	-0.0100393	-0.195033
Caiman	crocodilus	ROM	7719	Maxilla	13	Both	15.9683	0.198558	-0.0172608	-0.0245531	-0.198324
Caiman	crocodilus	ROM	7719	Maxilla	14	Both	14.5617	0.209734	0.00277148	-0.0182336	-0.207911
Caiman	crocodilus	ROM	7719	Maxilla	15	Right	13.221	0.202318	-0.0104734	-0.0242211	-0.200625
Caiman	crocodilus	ROM	7719	Dentary	1	Both	39.3415	-0.149937	0.0172368	-0.0462406	0.151102
Caiman	crocodilus	ROM	7719	Dentary	4	Left	41.2091	-0.19038	0.0136077	-0.00850501	0.188385
Caiman	crocodilus	ROM	7719	Dentary	5	Both	18.0993	-0.110186	-0.00175227	0.0164603	0.10941
Caiman	crocodilus	ROM	7719	Dentary	6	Both	16.4505	-0.118514	-0.00578088	0.0275074	0.117522
Caiman	crocodilus	ROM	7719	Dentary	7	Left	13.53	-0.0797566	-0.010039	0.0413781	0.0778441
Caiman	crocodilus	ROM	7719	Dentary	8	Left	14.194	-0.0733651	-0.0353553	0.0321192	0.0711568
Caiman	crocodilus	ROM	7719	Dentary	9	Left	13.2685	-0.027793	0.00951145	0.0304515	0.0289535
Caiman	crocodilus	ROM	7719	Dentary	10	Left	17.0294	-0.123357	-0.0151149	0.0356437	0.122649
Caiman	crocodilus	ROM	7719	Dentary	11	Left	25.2609	-0.0505278	-0.0094282	-0.00561903	0.050301
Caiman	crocodilus	ROM	7719	Dentary	12	Right	22.5537	0.00797963	1.542e-06	0.0144412	-0.00630983
Caiman	crocodilus	ROM	7719	Dentary	13	Right	18.3508	0.007304	0.016548	0.0237405	-0.00530618
Caiman	crocodilus	ROM	7719	Dentary	14	Left	17.5331	0.0728756	-0.00331416	0.0156067	-0.0746326
Caiman	crocodilus	ROM	7719	Dentary	15	Both	17.3706	0.134451	0.00756048	0.00207415	-0.133788
Caiman	crocodilus	ROM	7719	Dentary	16	Both	17.1657	0.125516	-0.0082097	-0.00182624	-0.125639
Caiman	crocodilus	ROM	7719	Dentary	17	Both	18.8518	0.15042	-0.0079907	-0.00693296	-0.15078
Caiman	crocodilus	ROM	7719	Dentary	18	Both	17.4004	0.168657	0.00737773	0.000989289	-0.16842
Caiman	crocodilus	ROM	7719	Dentary	19	Left	16.7177	0.164946	0.0292165	-0.0080509	-0.162983
Caiman	crocodilus	ROM	7719	Dentary	20	Both	15.021	0.162712	0.0113017	-0.0199362	-0.161858
Caiman	sclerops	UCMP	42844	Premaxilla	3	Both	30.4763	-0.109459	-0.0576527	0.0156407	0.107744
Caiman	sclerops	UCMP	42844	Premaxilla	4	Both	39.0012	-0.1326	0.0225126	0.00859826	0.134562
Caiman	sclerops	UCMP	42844	Maxilla	3	Both	29.7697	-0.140402	-0.0348825	0.0373945	0.140948
Caiman	sclerops	UCMP	42844	Maxilla	4	Both	37.8855	-0.0917171	0.0146616	0.0252962	0.0947575
Caiman	sclerops	UCMP	42844	Maxilla	5	Right	15.1365	-0.0143066	0.0267341	0.0232914	0.0210095
Caiman	sclerops	UCMP	42844	Maxilla	8	Both	21.0258	0.00426256	0.0155304	0.0374443	-0.00158225
Caiman	sclerops	UCMP	42844	Maxilla	9	Left	17.5866	0.0662488	-0.042117	0.0242111	-0.0650366
Caiman	sclerops	UCMP	42844	Dentary	1	Right	42.0238	-0.193018	0.0562637	-0.0148403	0.194562
Caiman	sclerops	UCMP	42844	Dentary	3	Right	17.5016	-0.0780182	-0.0950458	0.0256625	0.0760636
Caiman	sclerops	UCMP	42844	Dentary	4	Left	37.3649	-0.164709	0.0430391	0.00661123	0.166193
Caiman	sclerops	UCMP	42844	Dentary	5	Right	16.5669	-0.15845	0.00206472	0.0353509	0.160844
Caiman	sclerops	UCMP	42844	Dentary	7	Right	10.2952	-0.0179479	0.00519812	0.0456442	0.022963
Caiman	sclerops	UCMP	42844	Dentary	10	Left	19.9425	-0.0781852	0.00164444	0.0115283	0.0803213
Caiman	sclerops	UCMP	42844	Dentary	11	Left	25.4995	-0.0243184	-0.0998117	0.0268661	0.0222936
Caiman	sclerops	UCMP	42844	Dentary	12	Right	25.3695	-0.0824772	0.0269009	0.0231115	0.083891
Caiman	sclerops	UCMP	42844	Dentary	13	Right	19.2137	0.0879807	0.0115975	0.0151602	-0.0841285
Caiman	sclerops	UCMP	42844	Dentary	15	Right	19.2021	0.135443	-0.018292	0.0114802	-0.131943
Caiman	sclerops	UCMP	42844	Dentary	16	Both	16.8703	0.180787	0.0467111	0.0213908	-0.172971
Caiman	sclerops	UCMP	42844	Dentary	17	Both	16.1177	0.17987	-0.00233193	0.0137787	-0.175965
Caiman	sclerops	UCMP	42844	Dentary	19	Right	16.2415	0.147423	-0.0369858	0.017083	-0.14472
Caiman	sclerops	UCMP	42844	Dentary	20	Right	12.9415	0.209268	0.00177739	-0.0148698	-0.20524
Caiman	yacare	AMNH	97297	Premaxilla	3	Right	21.2676	-0.117941	-0.0819594	-0.0236153	0.115529
Caiman	yacare	AMNH	97297	Premaxilla	4	Right	27.6058	-0.199395	-0.0274306	-0.00753723	0.198269
Caiman	yacare	AMNH	97297	Premaxilla	5	Left	18.4168	-0.151801	0.030228	0.0237865	0.152185
Caiman	yacare	AMNH	97297	Maxilla	1	Left	13.3643	-0.111662	0.0450625	0.0214838	0.113319
Caiman	yacare	AMNH	97297	Maxilla	4	Left	28.0808	-0.150411	-0.0173308	0.00901415	0.149647
Caiman	yacare	AMNH	97297	Maxilla	5	Left	14.0318	-0.0965017	0.0592063	0.023879	0.100605
Caiman	yacare	AMNH	97297	Maxilla	7	Right	14.8838	-0.00116425	-0.00804093	0.0465107	0.00226531
Caiman	yacare	AMNH	97297	Maxilla	10	Left	15.4765	0.240808	-0.0199972	-0.00373242	-0.237106
Caiman	yacare	AMNH	97297	Maxilla	11	Both	14.3962	0.187843	-0.00315416	0.00940781	-0.186008
Caiman	yacare	AMNH	97297	Maxilla	12	Both	14.1937	0.209217	-0.0122462	-0.0100187	-0.20732
Caiman	yacare	AMNH	97297	Maxilla	13	Right	12.3572	0.214343	-0.0316078	-0.00833795	-0.211924
Caiman	yacare	AMNH	97297	Maxilla	14	Both	10.9257	0.234413	0.00408949	-0.0304328	-0.232029
Caiman	yacare	AMNH	97297	Maxilla	15	Both	8.91049	0.203775	-0.00065024	-0.0448155	-0.201761
Caiman	yacare	AMNH	97297	Dentary	1	Left	31.6499	-0.203504	0.0239442	-0.0135448	0.20268
Caiman	yacare	AMNH	97297	Dentary	2	Right	16.4701	-0.153084	0.0153829	-0.0033176	0.153385
Caiman	yacare	AMNH	97297	Dentary	4	Right	29.9071	-0.148022	0.0765754	0.00168286	0.150462
Caiman	yacare	AMNH	97297	Dentary	6	Right	14.045	-0.133011	0.0185925	0.0325809	0.132548
Caiman	yacare	AMNH	97297	Dentary	7	Right	11.4248	-0.0649249	0.0246427	0.0236262	0.0650997
Caiman	yacare	AMNH	97297	Dentary	8	Left	12.8569	-0.0788353	0.0185369	0.0226632	0.0782294
Caiman	yacare	AMNH	97297	Dentary	9	Left	12.7957	-0.0873079	-0.00163789	0.0317639	0.0863596
Caiman	yacare	AMNH	97297	Dentary	10	Both	14.7628	-0.0159769	0.0204896	0.0101692	0.0168317
Caiman	yacare	AMNH	97297	Dentary	13	Right	13.6878	0.0738638	0.0125658	0.0418245	-0.0698755
Caiman	yacare	AMNH	97297	Dentary	14	Both	13.3397	0.138828	-0.000214019	0.00383172	-0.136726
Caiman	yacare	AMNH	97297	Dentary	16	Both	15.045	0.174173	0.0019719	-0.0206446	-0.172495
Caiman	yacare	AMNH	97297	Dentary	17	Right	15.814	0.197693	-0.00390044	-0.0218911	-0.196516
Caiman	yacare	AMNH	97297	Dentary	18	Both	13.2011	0.189259	0.00782254	-0.0350678	-0.186965
Caiman	yacare	AMNH	97297	Dentary	19	Left	13.3574	0.204708	-0.0224512	-0.0471979	-0.204519
Caiman	yacare	AMNH	97297	Dentary	20	Left	10.0775	0.195549	0.0123059	-0.0651983	-0.192698
Caiman	yacare	AMNH	97300	Premaxilla	3	Both	43.6665	-0.11226	-0.0331349	-0.000146852	0.111694
Caiman	yacare	AMNH	97300	Premaxilla	5	Left	25.0366	-0.138864	0.0337408	0.0230277	0.141084
Caiman	yacare	AMNH	97300	Maxilla	1	Left	23.0992	-0.170801	0.00657994	0.0191352	0.171236
Caiman	yacare	AMNH	97300	Maxilla	2	Right	23.7701	-0.162603	-0.0213746	0.0272895	0.159998
Caiman	yacare	AMNH	97300	Maxilla	3	Both	31.2129	-0.0947163	-0.0687034	0.0121563	0.0945079
Caiman	yacare	AMNH	97300	Maxilla	4	Both	47.5627	-0.128533	-0.0265377	-0.00518767	0.128437
Caiman	yacare	AMNH	97300	Maxilla	5	Left	20.8717	-0.128086	0.0952859	-0.0158835	0.131263
Caiman	yacare	AMNH	97300	Maxilla	6	Both	18.2284	-0.086558	-0.0151212	0.0211633	0.0879388
Caiman	yacare	AMNH	97300	Maxilla	7	Both	19.4234	-0.0501716	-0.0080156	0.0120127	0.0502529
Caiman	yacare	AMNH	97300	Maxilla	8	Both	31.3957	-0.0494682	-0.00470482	-0.004545	0.0491486
Caiman	yacare	AMNH	97300	Maxilla	11	Both	22.6196	0.141497	-0.00695143	-0.015612	-0.139101
Caiman	yacare	AMNH	97300	Maxilla	12	Both	19.7992	0.164902	0.00430878	-0.00592731	-0.162641
Caiman	yacare	AMNH	97300	Maxilla	13	Both	16.4231	0.160514	-0.0280484	-0.0253389	-0.15955
Caiman	yacare	AMNH	97300	Maxilla	14	Left	13.0535	0.215777	-0.0133486	-0.022961	-0.214544
Caiman	yacare	AMNH	97300	Dentary	1	Both	56.9827	-0.216613	0.0405118	-0.0249275	0.215593
Caiman	yacare	AMNH	97300	Dentary	2	Right	19.2641	-0.137442	0.143981	0.0053445	0.144192
Caiman	yacare	AMNH	97300	Dentary	3	Both	22.7192	-0.14264	-0.00341391	0.0165015	0.142981
Caiman	yacare	AMNH	97300	Dentary	4	Both	49.2258	-0.156381	-0.00154406	-0.018872	0.155307
Caiman	yacare	AMNH	97300	Dentary	5	Left	19.4384	-0.1202	0.0207507	0.0089265	0.121625
Caiman	yacare	AMNH	97300	Dentary	7	Right	15.3707	-0.0273987	-0.0254843	0.00921689	0.0279804
Caiman	yacare	AMNH	97300	Dentary	8	Right	15.209	-0.0332109	0.0172328	-0.0182441	0.0325587
Caiman	yacare	AMNH	97300	Dentary	9	Left	19.7193	-0.138644	-0.0363983	0.0332129	0.136632
Caiman	yacare	AMNH	97300	Dentary	10	Both	33.0328	-0.118738	-0.002524	-0.00380673	0.119568
Caiman	yacare	AMNH	97300	Dentary	11	Both	36.7895	-0.0860299	0.0141257	-0.00407104	0.0874978
Caiman	yacare	AMNH	97300	Dentary	13	Both	18.1317	0.0514298	-0.00798942	-0.00577121	-0.0501844
Caiman	yacare	AMNH	97300	Dentary	14	Both	19.3345	0.147274	0.0362314	-0.0144928	-0.142617
Caiman	yacare	AMNH	97300	Dentary	15	Both	20.7166	0.126164	0.0248272	-0.0233162	-0.122944
Caiman	yacare	AMNH	97300	Dentary	16	Both	21.2562	0.118652	-0.0015606	-0.0199888	-0.117821
Caiman	yacare	AMNH	97300	Dentary	17	Both	20.1433	0.162927	0.014836	-0.0228898	-0.161137
Caiman	yacare	AMNH	97300	Dentary	18	Both	17.1807	0.183691	0.0522586	-0.0306652	-0.179322
Crocodylus	acutus	AMNH	7856	Premaxilla	2	Left	27.1096	-0.0880975	-0.000387067	-0.0215846	0.0877403
Crocodylus	acutus	AMNH	7856	Premaxilla	3	Right	50.235	-0.167978	0.0239521	-0.011133	0.165458
Crocodylus	acutus	AMNH	7856	Premaxilla	4	Right	62.1736	-0.188466	-0.0116689	-0.00770269	0.185368
Crocodylus	acutus	AMNH	7856	Premaxilla	5	Left	35.6047	-0.17457	0.000527573	-0.0153512	0.170573
Crocodylus	acutus	AMNH	7856	Maxilla	1	Both	33.9062	-0.15769	0.02991	-0.0157777	0.156225
Crocodylus	acutus	AMNH	7856	Maxilla	2	Right	38.3263	-0.148227	0.0247874	-0.00211899	0.147066
Crocodylus	acutus	AMNH	7856	Maxilla	3	Left	40.5586	-0.11742	0.019472	-0.0244595	0.118011
Crocodylus	acutus	AMNH	7856	Maxilla	5	Right	60.6609	-0.0580274	-0.00480864	-0.0557477	0.0604195
Crocodylus	acutus	AMNH	7856	Maxilla	6	Right	36.4039	-0.0479052	0.0357304	0.0133734	0.049704
Crocodylus	acutus	AMNH	7856	Maxilla	7	Left	32.4365	0.0262126	-0.00474114	0.0274663	-0.0242015
Crocodylus	acutus	AMNH	7856	Maxilla	8	Left	33.2918	0.076725	0.0395903	0.000502611	-0.0739486
Crocodylus	acutus	AMNH	7856	Maxilla	9	Left	37.9904	0.075243	0.0566546	0.0289234	-0.0709746
Crocodylus	acutus	AMNH	7856	Maxilla	10	Right	38.0864	0.100762	0.00950211	0.0296842	-0.0998034
Crocodylus	acutus	AMNH	7856	Maxilla	12	Both	30.6875	0.174306	0.0003692	0.0123653	-0.174415
Crocodylus	acutus	AMNH	7856	Maxilla	13	Right	26.371	0.203781	-0.00033933	0.0437799	-0.203535
Crocodylus	acutus	AMNH	7856	Dentary	1	Left	70.4675	-0.224161	0.0381889	-0.0200484	0.223111
Crocodylus	acutus	AMNH	7856	Dentary	2	Left	42.951	-0.142038	0.01418	-0.00407113	0.140734
Crocodylus	acutus	AMNH	7856	Dentary	6	Both	34.4772	-0.100286	0.00703032	-0.000848282	0.0996905
Crocodylus	acutus	AMNH	7856	Dentary	7	Both	34.2265	-0.10415	-0.0116875	0.0044313	0.10237
Crocodylus	acutus	AMNH	7856	Dentary	8	Right	30.8396	-0.0826228	-0.00307313	0.0268005	0.0821874
Crocodylus	acutus	AMNH	7856	Dentary	10	Left	35.6046	0.0811367	0.024468	0.0337248	-0.0797006
Crocodylus	acutus	AMNH	7856	Dentary	11	Right	44.296	0.00969251	0.0285783	-0.00367928	-0.00794828
Crocodylus	acutus	AMNH	7856	Dentary	12	Right	36.0287	0.10239	0.0281049	0.0111551	-0.10251
Crocodylus	acutus	AMNH	7856	Dentary	13	Left	33.2381	0.0586429	0.0417152	0.0247532	-0.0589344
Crocodylus	acutus	AMNH	7856	Dentary	14	Left	27.5907	0.154258	-0.0108328	0.0217168	-0.153914
Crocodylus	acutus	AMNH	7856	Dentary	15	Right	27.1401	0.224665	0.0617643	0.0202116	-0.221569
Crocodylus	acutus	AMNH	7857	Premaxilla	1	Left	30.7682	-0.221576	-0.0254644	0.00344578	0.217556
Crocodylus	acutus	AMNH	7857	Premaxilla	2	Both	26.162	-0.155118	-0.026827	-0.00607975	0.151589
Crocodylus	acutus	AMNH	7857	Premaxilla	3	Right	43.2489	-0.157068	0.0188514	-0.0153694	0.156555
Crocodylus	acutus	AMNH	7857	Premaxilla	4	Right	50.1084	-0.197189	0.00124963	-0.00558909	0.195321
Crocodylus	acutus	AMNH	7857	Maxilla	3	Left	37.4384	-0.146269	-0.0259521	0.00351044	0.143751
Crocodylus	acutus	AMNH	7857	Maxilla	5	Both	63.516	-0.177667	0.0130786	-0.00587444	0.176483
Crocodylus	acutus	AMNH	7857	Maxilla	7	Both	28.0147	0.0208916	0.0261387	0.00439072	-0.0195938
Crocodylus	acutus	AMNH	7857	Maxilla	8	Left	36.1991	0.00528187	-0.0143817	0.0275151	-0.00720524
Crocodylus	acutus	AMNH	7857	Maxilla	11	Both	34.7168	0.166135	0.00971816	0.0258401	-0.163272
Crocodylus	acutus	AMNH	7857	Maxilla	12	Both	29.0224	0.215226	0.00182922	0.0430116	-0.213649
Crocodylus	acutus	AMNH	7857	Dentary	1	Both	55.3911	-0.180727	0.0236298	-0.000646037	0.180589
Crocodylus	acutus	AMNH	7857	Dentary	2	Both	36.1039	-0.151858	0.0270072	0.0192696	0.151872
Crocodylus	acutus	AMNH	7857	Dentary	3	Left	34.2579	-0.103335	-0.0131606	0.0231523	0.102467
Crocodylus	acutus	AMNH	7857	Dentary	4	Left	64.8998	-0.167831	0.0378932	-0.0167138	0.167079
Crocodylus	acutus	AMNH	7857	Dentary	5	Both	31.7187	-0.0797419	0.0337836	0.00447428	0.0797862
Crocodylus	acutus	AMNH	7857	Dentary	6	Both	32.1569	-0.117878	0.0156208	0.0218544	0.117328
Crocodylus	acutus	AMNH	7857	Dentary	7	Left	31.5472	-0.0821524	0.0318563	-0.00104321	0.0816588
Crocodylus	acutus	AMNH	7857	Dentary	8	Left	29.2532	-0.033267	0.0596287	-0.00111861	0.0359745
Crocodylus	acutus	AMNH	7857	Dentary	9	Left	29.4754	0.00677759	0.00902382	0.0187608	-0.00746383
Crocodylus	acutus	AMNH	7857	Dentary	12	Left	34.544	0.0155562	0.0430765	0.00864988	-0.0126942
Crocodylus	acutus	AMNH	7857	Dentary	13	Left	28.774	0.173938	0.0173665	0.0357866	-0.169992
Crocodylus	acutus	AMNH	7857	Dentary	14	Both	28.7235	0.239449	0.0107258	0.0264971	-0.235144
Crocodylus	acutus	AMNH	7857	Dentary	15	Right	23.9908	0.238517	0.0252423	0.0262311	-0.234465
Crocodylus	affinis	UCMP	131090	Premaxilla	1	Right	39.889	-0.0179184	-0.073102	0.000417504	0.0178371
Crocodylus	affinis	UCMP	131090	Premaxilla	2	Both	36.9859	0.0464759	-0.0229783	0.0248998	-0.0429887
Crocodylus	affinis	UCMP	131090	Premaxilla	3	Right	61.0169	0.0959059	0.0114611	-0.00902348	-0.0874179
Crocodylus	affinis	UCMP	131090	Premaxilla	4	Right	60.9528	0.0922009	0.0744398	0.00712757	-0.0852653
Crocodylus	affinis	UCMP	131090	Maxilla	7	Both	43.2895	0.209114	-0.0197106	0.0116413	-0.202754
Crocodylus	affinis	UCMP	131090	Maxilla	9	Both	49.6559	0.23052	-0.0166677	0.0265007	-0.225774
Crocodylus	affinis	UCMP	131090	Maxilla	10	Left	59.5709	0.20185	0.0321921	0.00243997	-0.19389
Crocodylus	affinis	UCMP	131090	Maxilla	11	Both	54.5259	0.230474	0.0241442	0.014888	-0.22374
Crocodylus	affinis	UCMP	131090	Maxilla	12	Both	45.7893	0.272517	0.012009	-0.00188118	-0.266287
Crocodylus	affinis	UCMP	131090	Maxilla	13	Both	38.1952	0.286347	-0.00540063	0.00291247	-0.281429
Crocodylus	affinis	UCMP	131090	Maxilla	14	Left	32.9046	0.327179	-0.0197068	-0.0022596	-0.321711
Crocodylus	niloticus	AMNH	23471	Premaxilla	1	Left	45.8062	-0.0773813	0.0125858	-0.0189844	0.0764708
Crocodylus	niloticus	AMNH	23471	Premaxilla	2	Both	41.9818	-0.109934	0.019764	0.0190801	0.110421
Crocodylus	niloticus	AMNH	23471	Premaxilla	3	Left	65.0221	-0.118487	0.0243811	-0.00106826	0.119341
Crocodylus	niloticus	AMNH	23471	Premaxilla	4	Left	76.8351	-0.0907248	0.0176782	-0.00573889	0.0907626
Crocodylus	niloticus	AMNH	23471	Premaxilla	5	Right	73.9933	-0.100408	0.0404343	-0.00342823	0.100302
Crocodylus	niloticus	AMNH	23471	Maxilla	1	Left	34.0746	0.0238172	0.026735	0.00185357	-0.0200479
Crocodylus	niloticus	AMNH	23471	Maxilla	2	Left	45.0411	-0.105432	-0.0208371	0.0134712	0.105077
Crocodylus	niloticus	AMNH	23471	Maxilla	3	Left	43.3147	-0.0784882	-0.00452973	0.0166538	0.0776586
Crocodylus	niloticus	AMNH	23471	Maxilla	5	Left	94.0126	-0.0973778	-0.0251364	0.0187665	0.0986373
Crocodylus	niloticus	AMNH	23471	Maxilla	7	Both	40.5651	0.0222497	0.0113109	0.0137813	-0.0222796
Crocodylus	niloticus	AMNH	23471	Maxilla	8	Both	44.2972	0.0674929	0.0372068	0.0146328	-0.0656717
Crocodylus	niloticus	AMNH	23471	Maxilla	9	Both	54.1882	0.0959186	0.0297567	0.00346049	-0.0957318
Crocodylus	niloticus	AMNH	23471	Maxilla	10	Both	54.1602	0.113052	0.0149936	0.00842746	-0.111682
Crocodylus	niloticus	AMNH	23471	Maxilla	11	Both	44.8352	0.145953	0.0074509	0.00324135	-0.146067
Crocodylus	niloticus	AMNH	23471	Maxilla	12	Left	38.8137	0.1624	0.00755468	-0.00989403	-0.158909
Crocodylus	niloticus	AMNH	23471	Maxilla	13	Right	31.8663	0.16616	-0.00622263	0.0133931	-0.164908
Crocodylus	niloticus	AMNH	23471	Dentary	1	Left	85.5187	-0.145786	-0.00838652	-0.000510349	0.144217
Crocodylus	niloticus	AMNH	23471	Dentary	2	Left	58.2647	-0.0982067	0.0427703	0.012799	0.0983115
Crocodylus	niloticus	AMNH	23471	Dentary	3	Right	50.1648	-0.109273	0.015999	0.00904826	0.109222
Crocodylus	niloticus	AMNH	23471	Dentary	4	Left	82.3919	-0.163679	0.016289	-0.00588046	0.163297
Crocodylus	niloticus	AMNH	23471	Dentary	5	Left	42.0101	-0.0776806	0.04164	0.0241606	0.0780504
Crocodylus	niloticus	AMNH	23471	Dentary	6	Both	41.5509	-0.11325	0.0161934	0.0252073	0.111671
Crocodylus	niloticus	AMNH	23471	Dentary	7	Right	43.1217	-0.115765	0.011677	0.000242255	0.114808
Crocodylus	niloticus	AMNH	23471	Dentary	8	Both	40.8656	-0.0618637	0.0252537	0.0219533	0.0625745
Crocodylus	niloticus	AMNH	23471	Dentary	9	Right	42.9989	-0.0170773	-0.0241858	0.0186495	0.0147427
Crocodylus	niloticus	AMNH	23471	Dentary	10	Both	60.4573	-0.0243815	0.00202058	0.0178332	0.0237019
Crocodylus	niloticus	AMNH	23471	Dentary	11	Both	71.4652	0.00923235	0.0219131	0.0133641	-0.00800161
Crocodylus	niloticus	AMNH	23471	Dentary	12	Right	54.1104	0.0616204	-0.000354538	0.020847	-0.0616476
Crocodylus	niloticus	AMNH	23471	Dentary	13	Left	44.2484	0.154793	0.0019322	0.0223208	-0.155593
Crocodylus	niloticus	AMNH	23471	Dentary	14	Both	39.6623	0.175494	-0.0200886	-0.00425303	-0.173384
Crocodylus	niloticus	AMNH	23471	Dentary	15	Both	37.8566	0.177761	-0.015227	-0.00607873	-0.177228
Crocodylus	niloticus	AMNH	142494	Premaxilla	1	Both	33.5252	-0.102307	0.019218	-0.0106335	0.102726
Crocodylus	niloticus	AMNH	142494	Premaxilla	3	Right	37.2905	-0.0314156	0.0323683	0.0206763	0.0331495
Crocodylus	niloticus	AMNH	142494	Maxilla	1	Both	28.7385	-0.000155608	0.0323267	-0.00913818	0.00281586
Crocodylus	niloticus	AMNH	142494	Maxilla	5	Both	65.08	-0.0106548	-0.00415331	0.0136153	0.0129379
Crocodylus	niloticus	AMNH	142494	Maxilla	8	Right	29.4048	0.267588	0.0227648	-0.0173661	-0.262548
Crocodylus	niloticus	AMNH	142494	Maxilla	9	Both	35.0662	0.143126	0.0161967	0.0112513	-0.137597
Crocodylus	niloticus	AMNH	142494	Maxilla	10	Left	39.4005	0.265379	0.00992366	-0.0213807	-0.26293
Crocodylus	niloticus	AMNH	142494	Maxilla	11	Left	35.4644	0.203793	-0.0055426	-0.0194761	-0.200754
Crocodylus	niloticus	AMNH	142494	Maxilla	12	Left	30.3321	0.235275	0.00630521	0.00901495	-0.230476
Crocodylus	niloticus	AMNH	142494	Maxilla	13	Both	26.129	0.187393	-0.000622068	-0.0143225	-0.184066
Crocodylus	niloticus	AMNH	142494	Maxilla	14	Right	19.9481	0.218647	0.0296684	-0.00142809	-0.217397
Crocodylus	niloticus	AMNH	142494	Dentary	1	Both	57.3405	-0.183109	0.012936	-0.00942849	0.182176
Crocodylus	niloticus	AMNH	142494	Dentary	2	Left	34.0376	-0.178757	-0.00631766	0.011188	0.177154
Crocodylus	niloticus	AMNH	142494	Dentary	4	Both	61.435	-0.139831	-0.001024	0.0143028	0.141281
Crocodylus	niloticus	AMNH	142494	Dentary	5	Both	27.6762	-0.0788009	0.0489186	0.00676268	0.0816702
Crocodylus	niloticus	AMNH	142494	Dentary	6	Left	29.3537	-0.0742034	0.0289045	0.0213613	0.0749037
Crocodylus	niloticus	AMNH	142494	Dentary	7	Both	27.5616	-0.0607774	0.0133101	0.00748921	0.0609759
Crocodylus	niloticus	AMNH	142494	Dentary	8	Both	27.6634	-0.0917644	0.0200356	0.00344015	0.092943
Crocodylus	niloticus	AMNH	142494	Dentary	10	Both	44.3258	-0.0165947	-0.0193786	0.0225578	0.0176651
Crocodylus	niloticus	AMNH	142494	Dentary	11	Both	36.6465	0.165145	-0.00211632	0.0113283	-0.161133
Crocodylus	niloticus	AMNH	142494	Dentary	13	Both	27.7041	0.215088	-0.00845197	-0.00904268	-0.211408
Crocodylus	niloticus	AMNH	142494	Dentary	14	Both	24.8868	0.214871	0.00477109	-0.0215384	-0.210514
Crocodylus	palustris	AMNH	75707	Premaxilla	1	Left	31.7286	-0.141915	0.0335575	-0.00111555	0.142311
Crocodylus	palustris	AMNH	75707	Premaxilla	3	Right	45.1175	-0.105591	-0.0616446	0.000262843	0.100768
Crocodylus	palustris	AMNH	75707	Premaxilla	5	Left	31.1173	-0.163514	0.000728705	0.00388046	0.160605
Crocodylus	palustris	AMNH	75707	Maxilla	1	Right	30.0679	-0.129922	0.0486599	0.00124412	0.128813
Crocodylus	palustris	AMNH	75707	Maxilla	8	Left	27.9111	0.0538814	0.00652348	0.0151766	-0.0524292
Crocodylus	palustris	AMNH	75707	Maxilla	10	Both	37.2219	0.138616	-0.00982367	0.0091025	-0.135824
Crocodylus	palustris	AMNH	75707	Maxilla	11	Right	34.186	0.101145	0.0163979	0.0120599	-0.100042
Crocodylus	palustris	AMNH	75707	Maxilla	12	Right	30.0486	0.1056	-0.00944741	0.010857	-0.105498
Crocodylus	palustris	AMNH	75707	Maxilla	13	Both	25.5527	0.116353	0.0269238	0.000758938	-0.115358
Crocodylus	palustris	AMNH	75707	Dentary	1	Both	58.3996	-0.166572	0.0397442	-0.0148856	0.166904
Crocodylus	palustris	AMNH	75707	Dentary	2	Left	30.7364	-0.12764	0.0917186	0.0146727	0.130863
Crocodylus	palustris	AMNH	75707	Dentary	4	Left	61.9086	-0.134225	-0.00875612	-0.00289097	0.131847
Crocodylus	palustris	AMNH	75707	Dentary	5	Left	25.0725	-0.105736	-0.0330561	0.0265273	0.10332
Crocodylus	palustris	AMNH	75707	Dentary	6	Left	27.2897	-0.0747211	-0.00835114	0.0130027	0.0716017
Crocodylus	palustris	AMNH	75707	Dentary	7	Both	28.2825	-0.0178756	0.0333423	0.0248569	0.0187734
Crocodylus	palustris	AMNH	75707	Dentary	9	Both	27.3374	0.11515	0.0103647	0.015002	-0.114039
Crocodylus	palustris	AMNH	75707	Dentary	10	Right	35.2268	0.178611	0.0241099	0.0136434	-0.173982
Crocodylus	palustris	AMNH	75707	Dentary	11	Left	43.0744	0.12867	-0.0080602	0.0100793	-0.128669
Crocodylus	palustris	AMNH	75707	Dentary	12	Left	34.6831	0.17619	-0.0183223	0.0196696	-0.174002
Crocodylus	palustris	AMNH	75707	Dentary	13	Right	33.0873	0.172546	-0.000204828	0.0206411	-0.170868
Crocodylus	palustris	AMNH	75707	Dentary	14	Both	26.5353	0.212706	0.00797862	0.0236442	-0.209608
Crocodylus	palustris	AMNH	96134	Premaxilla	2	Both	15.6056	-0.136304	-0.0139014	-0.00934412	0.133142
Crocodylus	palustris	AMNH	96134	Premaxilla	3	Left	23.6196	-0.172955	-0.0172693	-0.0153019	0.169299
Crocodylus	palustris	AMNH	96134	Premaxilla	4	Both	30.5526	-0.132258	-0.0128467	-0.00256761	0.129734
Crocodylus	palustris	AMNH	96134	Premaxilla	5	Right	20.4468	-0.112096	0.0569091	-0.0140167	0.112413
Crocodylus	palustris	AMNH	96134	Maxilla	1	Right	16.6315	-0.124181	0.0246406	-0.0077271	0.123894
Crocodylus	palustris	AMNH	96134	Maxilla	4	Right	25.1717	-0.161508	-0.0755553	0.0121194	0.156942
Crocodylus	palustris	AMNH	96134	Maxilla	5	Both	32.2213	-0.161456	0.00932991	-0.000546783	0.160967
Crocodylus	palustris	AMNH	96134	Maxilla	8	Left	19.4019	0.122162	0.0102987	0.0301411	-0.122941
Crocodylus	palustris	AMNH	96134	Maxilla	9	Right	22.5125	0.121118	0.00658436	-0.000340956	-0.120491
Crocodylus	palustris	AMNH	96134	Maxilla	10	Both	23.8121	0.175682	0.00807221	0.0107815	-0.17377
Crocodylus	palustris	AMNH	96134	Maxilla	11	Both	23.2774	0.182313	-0.000878749	0.00492679	-0.181311
Crocodylus	palustris	AMNH	96134	Maxilla	12	Right	20.212	0.210822	-0.0113838	-0.00408432	-0.208952
Crocodylus	palustris	AMNH	96134	Maxilla	13	Left	17.1077	0.222356	-0.0452126	0.00498116	-0.221653
Crocodylus	palustris	AMNH	96134	Maxilla	14	Left	13.9418	0.173474	-0.0663162	-0.0102494	-0.176604
Crocodylus	palustris	AMNH	96134	Dentary	1	Left	25.0755	-0.22151	-0.0302472	0.0128364	0.220006
Crocodylus	palustris	AMNH	96134	Dentary	2	Left	18.5487	-0.0707552	0.0182719	-0.022137	0.0708797
Crocodylus	palustris	AMNH	96134	Dentary	3	Left	16.8104	-0.121237	0.0248411	-0.0192978	0.118871
Crocodylus	palustris	AMNH	96134	Dentary	5	Right	19.1345	-0.0795921	0.0179136	-0.0195142	0.077528
Crocodylus	palustris	AMNH	96134	Dentary	7	Right	18.9329	-0.0727374	0.0193289	-0.00939758	0.0710135
Crocodylus	palustris	AMNH	96134	Dentary	9	Left	18.0356	0.0592954	0.035227	-0.00603	-0.0590231
Crocodylus	palustris	AMNH	96134	Dentary	10	Left	20.0994	0.0574138	0.0219255	0.0221718	-0.0581124
Crocodylus	palustris	AMNH	96134	Dentary	12	Left	21.0024	0.0969809	0.0469024	0.0201809	-0.0949697
Crocodylus	palustris	AMNH	96134	Dentary	13	Left	17.3184	0.147737	0.0104493	0.0207947	-0.14823
Crocodylus	porosus	AMNH	66639	Premaxilla	1	Left	50.0133	-0.213342	0.00375243	-0.0208367	0.21149
Crocodylus	porosus	AMNH	66639	Maxilla	1	Right	37.1301	-0.16094	-0.0270316	-0.00846628	0.157466
Crocodylus	porosus	AMNH	66639	Maxilla	2	Left	45.643	-0.163053	-0.000419495	-0.0122358	0.161343
Crocodylus	porosus	AMNH	66639	Maxilla	4	Left	61.9082	-0.157971	-0.0441844	-0.0256036	0.156112
Crocodylus	porosus	AMNH	66639	Maxilla	5	Both	71.0665	-0.17191	0.00753351	-0.0101496	0.171172
Crocodylus	porosus	AMNH	66639	Maxilla	6	Right	43.3179	-0.0979869	0.0364256	-0.0127702	0.0971128
Crocodylus	porosus	AMNH	66639	Maxilla	7	Both	36.5865	-0.0496589	0.0160675	-0.0107291	0.0506018
Crocodylus	porosus	AMNH	66639	Maxilla	8	Left	33.8938	0.0227101	0.0159122	-0.0253274	-0.0211851
Crocodylus	porosus	AMNH	66639	Maxilla	9	Right	41.6722	-0.0247139	0.0220261	-0.00590328	0.0254075
Crocodylus	porosus	AMNH	66639	Maxilla	12	Both	33.7787	0.125186	-0.0192139	-0.00470576	-0.125285
Crocodylus	porosus	AMNH	66639	Maxilla	14	Both	27.5864	0.155732	-0.00399305	-0.0162101	-0.154569
Crocodylus	porosus	AMNH	66639	Dentary	1	Left	56.41	-0.212275	0.0701642	-0.0194723	0.213606
Crocodylus	porosus	AMNH	66639	Dentary	3	Both	38.7626	-0.183893	-0.0199842	-0.00532475	0.18125
Crocodylus	porosus	AMNH	66639	Dentary	4	Right	52.1196	-0.221366	0.0413991	-0.0123605	0.221218
Crocodylus	porosus	AMNH	66639	Dentary	8	Left	34.5485	-0.150461	0.031624	0.00608961	0.151174
Crocodylus	porosus	AMNH	66639	Dentary	10	Both	45.9363	-0.0957064	0.0248139	-0.00872714	0.0957259
Crocodylus	porosus	AMNH	66639	Dentary	11	Both	54.9886	-0.0876816	-0.0073571	-0.00420578	0.0864883
Crocodylus	porosus	AMNH	66639	Dentary	12	Right	39.1313	0.0156027	0.0201068	0.00174792	-0.0146111
Crocodylus	porosus	AMNH	66639	Dentary	13	Both	34.861	0.0476844	-0.0094717	0.00972827	-0.049275
Crocodylus	porosus	AMNH	66639	Dentary	14	Left	32.4527	0.0784445	0.00546906	-0.00632285	-0.0786596
Crocodylus	porosus	AMNH	66639	Dentary	15	Both	29.4815	0.167652	0.0196002	0.00677013	-0.16634
Crocodylus	porosus	AMNH	94957	Premaxilla	1	Left	41.12	-0.159878	-0.0180301	-0.00886822	0.157938
Crocodylus	porosus	AMNH	94957	Premaxilla	3	Both	58.7117	-0.150552	0.0182473	-0.00785029	0.150107
Crocodylus	porosus	AMNH	94957	Premaxilla	4	Left	93.609	-0.164944	-0.025683	-0.0292386	0.164308
Crocodylus	porosus	AMNH	94957	Premaxilla	5	Right	38.5155	-0.114927	0.0353558	-0.015312	0.114198
Crocodylus	porosus	AMNH	94957	Maxilla	1	Left	34.0853	-0.0689605	0.00675917	-0.0206043	0.0697707
Crocodylus	porosus	AMNH	94957	Maxilla	3	Both	48.5195	-0.0867012	0.0225469	-0.0118577	0.0885395
Crocodylus	porosus	AMNH	94957	Maxilla	5	Left	100.502	-0.104161	-0.0174431	-0.0312162	0.105974
Crocodylus	porosus	AMNH	94957	Maxilla	6	Both	53.1984	-0.0494298	0.00367291	-0.00866254	0.0479128
Crocodylus	porosus	AMNH	94957	Maxilla	7	Left	41.8748	0.0830407	0.0117419	-0.026599	-0.0820061
Crocodylus	porosus	AMNH	94957	Maxilla	8	Left	39.5688	0.104637	0.0188883	-0.00207715	-0.102112
Crocodylus	porosus	AMNH	94957	Maxilla	9	Left	45.3442	0.0977642	0.0100208	-0.00951342	-0.0962586
Crocodylus	porosus	AMNH	94957	Maxilla	10	Right	38.5952	0.153382	-0.0213908	0.00786786	-0.152024
Crocodylus	porosus	AMNH	94957	Maxilla	11	Right	35.5281	0.182658	0.00294688	-0.00958163	-0.181269
Crocodylus	porosus	AMNH	94957	Maxilla	12	Both	35.0145	0.165677	-0.0134951	-0.0129714	-0.162245
Crocodylus	porosus	AMNH	94957	Maxilla	13	Right	30.0773	0.14549	0.0465341	0.00400786	-0.141439
Crocodylus	porosus	AMNH	94957	Dentary	1	Right	85.2326	-0.196294	-0.00567312	-0.0140067	0.194859
Crocodylus	porosus	AMNH	94957	Dentary	2	Left	42.8892	-0.0522694	0.0501842	-0.0248775	0.0564168
Crocodylus	porosus	AMNH	94957	Dentary	3	Both	45.178	-0.132197	0.0256868	-0.0119757	0.131797
Crocodylus	porosus	AMNH	94957	Dentary	4	Left	78.1886	-0.132451	0.00471409	-0.00489781	0.13457
Crocodylus	porosus	AMNH	94957	Dentary	9	Right	43.8536	-0.0290112	-0.00626834	0.00396275	0.0295424
Crocodylus	porosus	AMNH	94957	Dentary	11	Both	56.9446	-0.0249075	-0.00221928	-0.00573013	0.0253685
Crocodylus	porosus	AMNH	94957	Dentary	12	Right	55.9083	0.00176236	-0.00107464	-0.00365024	-0.0011958
Crocodylus	porosus	AMNH	94957	Dentary	13	Both	39.0439	0.1253	0.0169338	0.00486726	-0.122475
Crocodylus	porosus	AMNH	94957	Dentary	15	Both	33.1453	0.170627	0.00805182	0.000543403	-0.168897
Crocodylus	siamensis	AMNH	49231	Premaxilla	5	Right	22.2589	-0.169869	0.0529288	0.0156052	0.173655
Crocodylus	siamensis	AMNH	49231	Maxilla	4	Right	30.1995	-0.0663581	-0.048682	0.00244233	0.0652593
Crocodylus	siamensis	AMNH	49231	Maxilla	5	Left	44.7287	-0.141725	0.0225516	0.0197001	0.144162
Crocodylus	siamensis	AMNH	49231	Maxilla	6	Right	23.1397	0.0555291	-0.0336022	0.0104968	-0.0555145
Crocodylus	siamensis	AMNH	49231	Maxilla	10	Both	27.6803	0.156255	0.00535637	0.0440189	-0.152369
Crocodylus	siamensis	AMNH	49231	Maxilla	11	Left	25.2902	0.208351	0.0362503	0.0540584	-0.205283
Crocodylus	siamensis	AMNH	49231	Maxilla	12	Both	20.8083	0.252049	0.00668447	0.0101787	-0.247565
Crocodylus	siamensis	AMNH	49231	Maxilla	13	Right	15.4812	0.211078	0.0009296	0.0469162	-0.209188
Crocodylus	siamensis	AMNH	49231	Dentary	1	Left	47.2675	-0.234179	0.0362982	-0.0109837	0.234473
Crocodylus	siamensis	AMNH	49231	Dentary	3	Right	27.697	-0.17942	0.0659327	-0.00291699	0.178637
Crocodylus	siamensis	AMNH	49231	Dentary	4	Both	43.3576	-0.191166	0.00937641	0.00514649	0.191287
Crocodylus	siamensis	AMNH	49231	Dentary	7	Both	22.9437	-0.108073	0.0446359	-0.00122692	0.1087
Crocodylus	siamensis	AMNH	49231	Dentary	8	Both	22.8529	-0.098499	0.00315831	0.0245943	0.0968283
Crocodylus	siamensis	AMNH	49231	Dentary	9	Right	22.7034	-0.0740224	0.0286058	0.0266303	0.0742637
Crocodylus	siamensis	AMNH	49231	Dentary	10	Left	28.3871	-0.0309917	0.0113401	0.0326791	0.0316385
Crocodylus	siamensis	AMNH	49231	Dentary	11	Both	31.6086	-0.0293651	0.0023764	0.0375826	0.0331993
Crocodylus	siamensis	AMNH	49231	Dentary	12	Both	25.8932	0.149796	-0.0180223	0.0475504	-0.147268
Crocodylus	siamensis	AMNH	49231	Dentary	13	Both	22.7617	0.217165	-0.0060278	0.0537009	-0.213542
Crocodylus	siamensis	AMNH	49231	Dentary	14	Both	22.2712	0.229816	0.0262771	0.0427154	-0.225289
Crocodylus	siamensis	AMNH	49231	Dentary	15	Left	20.5876	0.267317	0.00462349	0.0439742	-0.261758
Crocodylus	siamensis	AMNH	72640	Premaxilla	3	Left	24.5617	-0.193682	0.0081232	0.00136761	0.191659
Crocodylus	siamensis	AMNH	72640	Premaxilla	4	Left	25.3472	-0.125509	0.00118619	-0.00911689	0.126321
Crocodylus	siamensis	AMNH	72640	Premaxilla	5	Both	17.9482	-0.150224	-0.0154165	0.0096305	0.148438
Crocodylus	siamensis	AMNH	72640	Maxilla	1	Right	16.1238	-0.186898	0.026331	-0.00246347	0.185089
Crocodylus	siamensis	AMNH	72640	Maxilla	2	Both	20.9862	-0.144963	-0.0150992	0.0115863	0.142418
Crocodylus	siamensis	AMNH	72640	Maxilla	3	Both	22.1821	-0.168439	-0.0546816	0.0237191	0.16395
Crocodylus	siamensis	AMNH	72640	Maxilla	4	Both	24.8462	-0.146495	-0.00253186	0.0340958	0.144326
Crocodylus	siamensis	AMNH	72640	Maxilla	5	Both	32.9772	-0.160279	0.00201078	0.020205	0.159255
Crocodylus	siamensis	AMNH	72640	Maxilla	6	Both	18.2126	-0.0508601	-0.00503761	0.0338769	0.0502175
Crocodylus	siamensis	AMNH	72640	Maxilla	7	Both	17.8825	-0.0366645	0.0138933	0.0168586	0.0361611
Crocodylus	siamensis	AMNH	72640	Maxilla	8	Both	16.6865	0.0518997	-0.0306289	0.0322781	-0.0534515
Crocodylus	siamensis	AMNH	72640	Maxilla	9	Left	18.6366	0.0930088	-0.0361011	0.0156093	-0.0935847
Crocodylus	siamensis	AMNH	72640	Maxilla	10	Right	15.1272	0.277546	-0.0575312	0.0245117	-0.276714
Crocodylus	siamensis	AMNH	72640	Maxilla	11	Left	15.9024	0.306668	-0.0124438	0.0247583	-0.302768
Crocodylus	siamensis	AMNH	72640	Maxilla	12	Both	14.4395	0.299281	-0.0189628	0.0344815	-0.294982
Crocodylus	siamensis	AMNH	72640	Maxilla	13	Both	12.554	0.239852	-0.0390004	0.027665	-0.239106
Crocodylus	siamensis	AMNH	72640	Dentary	1	Both	32.78	-0.212461	0.0414342	0.00164447	0.211325
Crocodylus	siamensis	AMNH	72640	Dentary	2	Both	20.892	-0.151523	0.0547039	0.0240495	0.15189
Crocodylus	siamensis	AMNH	72640	Dentary	3	Both	16.6198	-0.127497	-0.00726198	0.0494819	0.125779
Crocodylus	siamensis	AMNH	72640	Dentary	4	Left	28.0569	-0.173365	0.0164845	0.022849	0.172477
Crocodylus	siamensis	AMNH	72640	Dentary	5	Left	17.1392	-0.0946312	0.0224682	0.0416266	0.0932708
Crocodylus	siamensis	AMNH	72640	Dentary	6	Both	16.6669	-0.0702909	-0.000449383	0.0146879	0.0683735
Crocodylus	siamensis	AMNH	72640	Dentary	7	Both	16.6263	-0.032964	0.00897172	0.0383017	0.0318851
Crocodylus	siamensis	AMNH	72640	Dentary	8	Right	15.5367	-0.0404629	0.024714	0.0498664	0.0412241
Crocodylus	siamensis	AMNH	72640	Dentary	9	Right	17.1825	-0.0254822	0.0136219	0.0310918	0.0229817
Crocodylus	siamensis	AMNH	72640	Dentary	10	Left	20.0127	-0.0165233	0.0337769	0.0561683	0.017775
Crocodylus	siamensis	AMNH	72640	Dentary	11	Right	22.7736	0.0847178	-0.0140704	0.0293672	-0.0833127
Crocodylus	siamensis	AMNH	72640	Dentary	12	Both	18.6196	0.153532	0.00244895	0.0176935	-0.152273
Crocodylus	siamensis	AMNH	72640	Dentary	13	Left	20.3994	0.0662677	-0.0146971	0.0213775	-0.066288
Gavialis	gangeticus	AMNH	131377	Premaxilla	3	Left	39.9431	-0.278487	-0.0568131	-0.0416215	0.274951
Gavialis	gangeticus	AMNH	131377	Premaxilla	4	Right	41.8099	-0.29907	0.0487406	-0.0348431	0.29934
Gavialis	gangeticus	AMNH	131377	Premaxilla	5	Right	26.4639	-0.307015	0.0106826	-0.0130513	0.304897
Gavialis	gangeticus	AMNH	131377	Maxilla	1	Both	32.2233	-0.309052	0.0681258	-0.0226874	0.30976
Gavialis	gangeticus	AMNH	131377	Maxilla	2	Right	34.5147	-0.317287	-0.00759958	-0.0241696	0.314489
Gavialis	gangeticus	AMNH	131377	Maxilla	3	Both	33.1033	-0.302742	-0.0235695	-0.0241743	0.29959
Gavialis	gangeticus	AMNH	131377	Maxilla	4	Left	30.915	-0.30754	0.0101882	-0.0246145	0.304621
Gavialis	gangeticus	AMNH	131377	Maxilla	5	Left	31.3358	-0.284003	0.0362512	-0.0270326	0.283089
Gavialis	gangeticus	AMNH	131377	Maxilla	6	Right	29.127	-0.294214	-0.00954248	-0.0236514	0.292231
Gavialis	gangeticus	AMNH	131377	Maxilla	7	Both	31.3699	-0.309964	-0.0121845	-0.0210503	0.306494
Gavialis	gangeticus	AMNH	131377	Maxilla	8	Both	33.711	-0.3078	-0.0740943	-0.0177297	0.301664
Gavialis	gangeticus	AMNH	131377	Maxilla	9	Both	31.5166	-0.306633	-0.0486484	-0.016156	0.301822
Gavialis	gangeticus	AMNH	131377	Maxilla	10	Both	30.4746	-0.302854	0.0147701	-0.0258183	0.300712
Gavialis	gangeticus	AMNH	131377	Maxilla	12	Both	28.2947	-0.281336	-0.0570197	-0.0152828	0.276794
Gavialis	gangeticus	AMNH	131377	Maxilla	13	Both	29.0854	-0.284997	-0.0191829	-0.00605624	0.281947
Gavialis	gangeticus	AMNH	131377	Maxilla	14	Both	30.1134	-0.285201	-0.0197349	-0.0102976	0.282312
Gavialis	gangeticus	AMNH	131377	Maxilla	15	Right	29.3751	-0.274633	-0.0737464	0.0037064	0.269205
Gavialis	gangeticus	AMNH	131377	Maxilla	16	Right	26.7988	-0.264393	-0.0686103	0.00352723	0.260155
Gavialis	gangeticus	AMNH	131377	Maxilla	17	Left	26.0791	-0.260756	-0.0393355	-0.00807785	0.256829
Gavialis	gangeticus	AMNH	131377	Maxilla	18	Right	27.1455	-0.241833	0.00130382	0.00215376	0.241621
Gavialis	gangeticus	AMNH	131377	Maxilla	20	Left	23.4341	-0.171224	-0.0457732	0.00364241	0.169044
Gavialis	gangeticus	AMNH	131377	Maxilla	21	Left	18.9712	-0.108596	0.102303	0.0229227	0.115111
Gavialis	gangeticus	AMNH	131377	Dentary	1	Left	46.0284	-0.290833	0.034784	-0.0467779	0.290514
Gavialis	gangeticus	AMNH	131377	Dentary	2	Left	46.7416	-0.282159	0.12675	-0.0372319	0.286298
Gavialis	gangeticus	AMNH	131377	Dentary	3	Left	30.8796	-0.310286	0.0229175	-0.022937	0.308779
Gavialis	gangeticus	AMNH	131377	Dentary	4	Both	33.4073	-0.29952	-0.0300623	-0.0241336	0.295547
Gavialis	gangeticus	AMNH	131377	Dentary	5	Both	32.3512	-0.303994	0.0830064	-0.016016	0.30589
Gavialis	gangeticus	AMNH	131377	Dentary	6	Both	29.729	-0.281846	0.0302479	-0.0226562	0.281608
Gavialis	gangeticus	AMNH	131377	Dentary	7	Both	32.4788	-0.315793	-0.0246122	-0.0200019	0.311953
Gavialis	gangeticus	AMNH	131377	Dentary	8	Left	29.9878	-0.314219	-0.0181627	-0.0203892	0.310935
Gavialis	gangeticus	AMNH	131377	Dentary	9	Right	31.5465	-0.315302	0.0281215	-0.0255524	0.314517
Gavialis	gangeticus	AMNH	131377	Dentary	10	Left	29.9035	-0.307906	-0.0145345	-0.00951997	0.304341
Gavialis	gangeticus	AMNH	131377	Dentary	12	Both	28.6083	-0.303916	-0.00502539	-0.011476	0.301971
Gavialis	gangeticus	AMNH	131377	Dentary	13	Left	30.1905	-0.296918	0.043351	-0.0146354	0.296428
Gavialis	gangeticus	AMNH	131377	Dentary	14	Right	25.3137	-0.300311	-0.0421856	-0.0167099	0.296732
Gavialis	gangeticus	AMNH	131377	Dentary	15	Left	30.489	-0.306389	-0.0389171	-0.0119339	0.302999
Gavialis	gangeticus	AMNH	131377	Dentary	17	Both	26.9937	-0.27995	-0.0227677	-0.00421596	0.277572
Gavialis	gangeticus	AMNH	131377	Dentary	18	Right	24.5763	-0.27866	0.0154806	-0.0108269	0.278001
Gavialis	gangeticus	AMNH	131377	Dentary	19	Right	26.2169	-0.258661	0.0387021	0.00364804	0.259883
Gavialis	gangeticus	AMNH	131377	Dentary	20	Both	19.8273	-0.219672	-0.00791553	-0.00253	0.219244
Gavialis	gangeticus	AMNH	131377	Dentary	21	Both	19.8127	-0.209031	-0.00602137	0.0041153	0.208707
Gavialis	gangeticus	AMNH	131377	Dentary	22	Both	19.7959	-0.145608	-0.00367217	0.0154855	0.146786
Gavialis	gangeticus	AMNH	131377	Dentary	23	Left	16.3534	-0.034139	0.0398769	0.0321564	0.0376589
Gavialis	gangeticus	AMNH	131377	Dentary	24	Right	20.6172	-0.0759623	0.0583714	0.0269387	0.0803407
Gavialis	gangeticus	AMNH	131377	Dentary	25	Both	18.0261	-0.0321488	0.0985067	0.0198828	0.0372785
Gavialis	gangeticus	AMNH	131377	Dentary	26	Right	20.3833	-0.0324791	0.0911145	0.0482965	0.0384428
Hamadasuchus	rebouli	ROM	52620	Premaxilla	3	Left	30.7953	-0.129904	-0.0188329	-0.0263607	0.131689
Hamadasuchus	rebouli	ROM	52620	Premaxilla	4	Right	63.9954	-0.197872	-0.00154516	-0.020769	0.197584
Hamadasuchus	rebouli	ROM	52620	Maxilla	1	Left	28.7629	-0.147171	-0.00492651	0.01559	0.146789
Hamadasuchus	rebouli	ROM	52620	Maxilla	2	Left	32.2287	-0.0864692	0.018317	0.0210469	0.0883051
Hamadasuchus	rebouli	ROM	52620	Maxilla	3	Left	54.4508	-0.141926	-0.0258215	0.0117363	0.142387
Hamadasuchus	rebouli	ROM	52620	Maxilla	4	Both	36.1353	-0.0397582	0.0283169	-0.00133806	0.0410225
Hamadasuchus	rebouli	ROM	52620	Maxilla	6	Right	30.3222	-0.0234951	0.0199945	0.0190447	0.0263549
Hamadasuchus	rebouli	ROM	52620	Maxilla	8	Both	45.8572	0.0255676	0.0014326	-0.0122225	-0.023502
Hamadasuchus	rebouli	ROM	52620	Maxilla	9	Both	39.9301	0.0677578	0.0294123	0.0170757	-0.0648652
Hamadasuchus	rebouli	ROM	52620	Maxilla	10	Both	31.8971	0.122538	-0.00155205	0.0117757	-0.12021
Hamadasuchus	rebouli	ROM	52620	Maxilla	11	Both	27.6993	0.211821	0.000315443	0.00718476	-0.209372
Hamadasuchus	rebouli	ROM	52620	Maxilla	12	Both	24.0384	0.128615	0.00238316	0.0166137	-0.128489
Hamadasuchus	rebouli	ROM	52620	Maxilla	13	Both	22.6335	0.222777	-0.00584627	0.0134222	-0.221129
Hamadasuchus	rebouli	ROM	52620	Maxilla	14	Both	20.6664	0.20117	-0.0137633	0.0127088	-0.200199
leidyosuchus	canadensis	ROM	1903	Premaxilla	4	Right	49.9772	-0.0990742	0.162701	-0.0326135	0.104962
leidyosuchus	canadensis	ROM	1903	Premaxilla	5	Both	26.3563	-0.0906829	0.0833054	-0.0121546	0.0941393
leidyosuchus	canadensis	ROM	1903	Maxilla	2	Both	29.5712	-0.0661556	-0.0212527	0.00142068	0.0656119
leidyosuchus	canadensis	ROM	1903	Maxilla	3	Both	40.6347	-0.0870126	-0.0162007	-0.014765	0.0862269
leidyosuchus	canadensis	ROM	1903	Maxilla	4	Both	67.6728	-0.091137	0.0227818	-0.0199879	0.0923408
leidyosuchus	canadensis	ROM	1903	Maxilla	5	Right	58.0741	-0.0141593	0.0310269	0.011556	0.0184099
leidyosuchus	canadensis	ROM	1903	Maxilla	6	Left	31.4421	-0.00839783	0.0532445	0.0274873	0.013727
leidyosuchus	canadensis	ROM	1903	Maxilla	7	Left	27.9024	0.0279585	0.0366264	0.0143643	-0.024538
leidyosuchus	canadensis	ROM	1903	Maxilla	8	Left	24.716	0.0477933	-0.0275999	-0.000712403	-0.0467424
leidyosuchus	canadensis	ROM	1903	Maxilla	9	Both	27.0939	0.0555173	0.0143728	-0.00388713	-0.0521361
leidyosuchus	canadensis	ROM	1903	Maxilla	10	Left	27.1102	0.0368695	-0.00275908	0.025799	-0.0353371
leidyosuchus	canadensis	ROM	1903	Maxilla	11	Both	31.2647	0.0597038	0.0191895	0.00380336	-0.0569421
leidyosuchus	canadensis	ROM	1903	Maxilla	12	Left	31.334	0.110528	-0.0149834	0.000621911	-0.109419
leidyosuchus	canadensis	ROM	1903	Maxilla	13	Both	32.2317	0.144158	0.0317876	-0.0126801	-0.139619
leidyosuchus	canadensis	ROM	1903	Maxilla	14	Right	29.8194	0.144966	-0.0112502	-0.0171507	-0.142731
leidyosuchus	canadensis	ROM	1903	Maxilla	15	Left	26.3077	0.201372	-0.0219953	0.00260952	-0.198662
leidyosuchus	canadensis	ROM	1903	Maxilla	16	Left	25.2425	0.226657	-0.0330129	-0.0154647	-0.226527
leidyosuchus	canadensis	ROM	1903	Maxilla	17	Left	20.2192	0.220126	-0.0063654	-0.0352836	-0.22022
Mecistops	cataphractus	AMNH	107634	Premaxilla	1	Right	23.1413	-0.238003	-0.0587697	-0.022206	0.233873
Mecistops	cataphractus	AMNH	107634	Premaxilla	4	Right	27.2113	-0.247452	-0.0041551	-0.00679008	0.24477
Mecistops	cataphractus	AMNH	107634	Maxilla	1	Both	23.874	-0.235126	-0.0167356	-0.00477842	0.233386
Mecistops	cataphractus	AMNH	107634	Maxilla	2	Right	28.2134	-0.233196	-0.0136786	-0.00341789	0.229633
Mecistops	cataphractus	AMNH	107634	Maxilla	3	Both	30.3079	-0.212022	-0.0763466	-0.00564767	0.206738
Mecistops	cataphractus	AMNH	107634	Maxilla	4	Right	37.8131	-0.218887	-0.0601681	-0.00903007	0.214959
Mecistops	cataphractus	AMNH	107634	Maxilla	5	Both	40.5001	-0.190821	0.0203718	-0.00373052	0.190493
Mecistops	cataphractus	AMNH	107634	Maxilla	6	Right	18.6071	-0.0954022	-0.0330532	0.0197205	0.0936211
Mecistops	cataphractus	AMNH	107634	Maxilla	7	Right	25.4355	-0.133999	0.0496525	-0.0217261	0.134753
Mecistops	cataphractus	AMNH	107634	Maxilla	8	Both	23.2557	-0.0990509	0.0107639	0.00670383	0.0987693
Mecistops	cataphractus	AMNH	107634	Maxilla	9	Both	23.8092	-0.0935657	-0.000737853	0.000960414	0.0929001
Mecistops	cataphractus	AMNH	107634	Maxilla	10	Right	24.0095	-0.0173472	-0.0181161	0.012893	0.0175991
Mecistops	cataphractus	AMNH	107634	Maxilla	11	Both	22.9214	0.029272	-0.00233449	-0.00152821	-0.0293025
Mecistops	cataphractus	AMNH	107634	Maxilla	12	Both	19.3686	0.0681391	-0.00781895	0.000480406	-0.0672935
Mecistops	cataphractus	AMNH	107634	Maxilla	13	Both	17.8748	0.065918	0.0190428	-0.0179246	-0.0647746
Mecistops	cataphractus	AMNH	107634	Dentary	1	Both	37.6637	-0.249179	0.0199001	-0.0116303	0.247097
Mecistops	cataphractus	AMNH	107634	Dentary	2	Left	26.8662	-0.238831	-0.0581467	-0.0105019	0.232919
Mecistops	cataphractus	AMNH	107634	Dentary	3	Right	25.8382	-0.218963	0.00568797	-0.00355594	0.215316
Mecistops	cataphractus	AMNH	107634	Dentary	4	Both	38.3087	-0.241181	-0.0529577	-0.0132101	0.237066
Mecistops	cataphractus	AMNH	107634	Dentary	5	Both	25.228	-0.201885	0.0155977	-0.00314184	0.200243
Mecistops	cataphractus	AMNH	107634	Dentary	6	Both	23.7114	-0.178835	0.0303805	0.0138172	0.178668
Mecistops	cataphractus	AMNH	107634	Dentary	7	Both	22.451	-0.1559	0.0319553	0.00782584	0.156745
Mecistops	cataphractus	AMNH	107634	Dentary	8	Left	22.0121	-0.153051	-0.0390555	0.0323107	0.150495
Mecistops	cataphractus	AMNH	107634	Dentary	9	Both	24.2049	-0.145293	-0.00988782	0.0133653	0.143072
Mecistops	cataphractus	AMNH	107634	Dentary	10	Both	28.3981	-0.136659	-0.00755808	0.0136552	0.135329
Mecistops	cataphractus	AMNH	107634	Dentary	11	Both	28.5263	-0.0884823	-0.0347436	0.0201422	0.0866248
Mecistops	cataphractus	AMNH	107634	Dentary	12	Left	22.802	-0.0238234	-0.029337	0.0181858	0.0217414
Mecistops	cataphractus	AMNH	107634	Dentary	13	Left	19.2564	0.00459597	0.0203032	0.032763	-0.00343122
Mecistops	cataphractus	AMNH	107634	Dentary	14	Both	17.6463	0.0127482	-0.0105107	0.0283476	-0.0126851
Mecistops	cataphractus	AMNH	107634	Dentary	15	Both	17.201	0.0322044	-0.0104954	0.011396	-0.0325184
Osteolaemus	tetraspis	AMNH	117801	Premaxilla	4	Left	33.8152	-0.126659	0.00646436	-0.0212299	0.126365
Osteolaemus	tetraspis	AMNH	117801	Premaxilla	5	Left	18.7509	-0.0980376	-0.00409503	-0.0373611	0.0962494
Osteolaemus	tetraspis	AMNH	117801	Maxilla	1	Left	14.7484	-0.0684589	0.00787801	-0.0337033	0.06561
Osteolaemus	tetraspis	AMNH	117801	Maxilla	2	Both	18.4369	-0.0954957	-0.000301956	-0.0364995	0.092899
Osteolaemus	tetraspis	AMNH	117801	Maxilla	4	Both	28.2372	-0.0738733	0.0115709	-0.0345111	0.0743553
Osteolaemus	tetraspis	AMNH	117801	Maxilla	5	Left	38.9385	-0.0846234	-0.00687585	-0.0336434	0.0852967
Osteolaemus	tetraspis	AMNH	117801	Maxilla	6	Both	20.6225	-0.012851	0.0229778	-0.0228037	0.0129987
Osteolaemus	tetraspis	AMNH	117801	Maxilla	7	Both	16.0559	0.0378757	-0.00545066	-0.0224717	-0.0397565
Osteolaemus	tetraspis	AMNH	117801	Maxilla	9	Both	17.3469	0.179632	-0.0149168	-0.056362	-0.179631
Osteolaemus	tetraspis	AMNH	117801	Maxilla	10	Right	23.7686	0.195068	-0.00190414	-0.0476484	-0.195289
Osteolaemus	tetraspis	AMNH	117801	Maxilla	11	Both	26.5016	0.290756	-0.0567826	-0.0263754	-0.289756
Osteolaemus	tetraspis	AMNH	117801	Maxilla	12	Both	20.4345	0.286146	-0.0471063	-0.0420208	-0.287284
Osteolaemus	tetraspis	AMNH	117801	Dentary	1	Right	24.9256	-0.103672	0.0127137	-0.0435175	0.104162
Osteolaemus	tetraspis	AMNH	117801	Dentary	3	Right	17.3199	-0.0366265	-0.0210546	-0.0646278	0.0355371
Osteolaemus	tetraspis	AMNH	117801	Dentary	4	Right	38.6166	-0.131982	-0.0389215	-0.0511518	0.130008
Osteolaemus	tetraspis	AMNH	117801	Dentary	5	Right	19.5615	-0.0945658	0.0136983	-0.0412705	0.0921769
Osteolaemus	tetraspis	AMNH	117801	Dentary	6	Both	18.3119	-0.0650995	-0.0010527	-0.0115445	0.0625622
Osteolaemus	tetraspis	AMNH	117801	Dentary	8	Both	15.4597	-0.0199484	-0.0161685	-0.00230944	0.0159767
Osteolaemus	tetraspis	AMNH	117801	Dentary	9	Both	15.5183	0.00597235	0.0240409	-0.000844155	-0.00645138
Osteolaemus	tetraspis	AMNH	117801	Dentary	11	Both	29.3909	0.0721535	0.0206442	-0.0245269	-0.0709761
Osteolaemus	tetraspis	AMNH	117801	Dentary	12	Both	22.2709	0.217773	-0.0103658	-0.058453	-0.216808
Osteolaemus	tetraspis	AMNH	117801	Dentary	13	Both	20.7604	0.322205	-0.0312079	-0.0457977	-0.320764
Osteolaemus	tetraspis	AMNH	117801	Dentary	14	Left	18.1065	0.335487	-0.0131413	-0.0528401	-0.334769
Osteolaemus	tetraspis	AMNH	117802	Premaxilla	1	Right	9.56705	-0.0924021	-0.0167889	-0.00273782	0.0899364
Osteolaemus	tetraspis	AMNH	117802	Premaxilla	4	Right	19.1555	-0.0416278	-0.0172404	-0.0567699	0.0413947
Osteolaemus	tetraspis	AMNH	117802	Premaxilla	5	Right	12.9675	-0.129793	-0.0332746	0.00325029	0.126141
Osteolaemus	tetraspis	AMNH	117802	Maxilla	1	Both	9.15403	-0.0777623	-0.0194286	-0.0207905	0.0749737
Osteolaemus	tetraspis	AMNH	117802	Maxilla	2	Both	12.1878	-0.0829296	-0.00122725	-0.0124761	0.0806277
Osteolaemus	tetraspis	AMNH	117802	Maxilla	3	Right	13.0479	-0.101437	0.0480344	0.00470563	0.103114
Osteolaemus	tetraspis	AMNH	117802	Maxilla	4	Right	17.684	-0.118374	-0.0637839	0.0104978	0.11432
Osteolaemus	tetraspis	AMNH	117802	Maxilla	5	Both	21.09	-0.0909845	0.000985915	-0.0242962	0.0898518
Osteolaemus	tetraspis	AMNH	117802	Maxilla	6	Both	13.6664	0.044119	-0.00795379	-0.00015102	-0.045788
Osteolaemus	tetraspis	AMNH	117802	Maxilla	7	Both	10.6889	0.0774298	0.000728802	-0.00186037	-0.07844
Osteolaemus	tetraspis	AMNH	117802	Maxilla	8	Both	10.9335	0.213793	-0.016859	-0.0198971	-0.213757
Osteolaemus	tetraspis	AMNH	117802	Maxilla	9	Both	12.7591	0.242739	-0.0182961	-0.0447543	-0.243082
Osteolaemus	tetraspis	AMNH	117802	Maxilla	10	Left	20.6416	0.245289	-0.00979766	-0.0243418	-0.244901
Osteolaemus	tetraspis	AMNH	117802	Maxilla	11	Both	20.1289	0.32778	-0.0183754	-0.0127444	-0.325523
Osteolaemus	tetraspis	AMNH	117802	Maxilla	12	Both	14.1251	0.338135	-0.0244324	-0.0157081	-0.33395
Osteolaemus	tetraspis	AMNH	117802	Dentary	1	Left	14.8183	-0.11039	-0.0360749	-0.024731	0.107174
Osteolaemus	tetraspis	AMNH	117802	Dentary	2	Right	12.0751	-0.110317	0.0335281	0.0147358	0.109044
Osteolaemus	tetraspis	AMNH	117802	Dentary	3	Left	12.2011	-0.08543	-0.0564798	0.0353392	0.0812307
Osteolaemus	tetraspis	AMNH	117802	Dentary	4	Both	18.7609	-0.123666	0.00576467	-0.015065	0.121979
Osteolaemus	tetraspis	AMNH	117802	Dentary	5	Both	11.0657	-0.0548202	-0.00451288	0.00397629	0.0514235
Osteolaemus	tetraspis	AMNH	117802	Dentary	6	Both	11.1557	0.00220919	0.0114082	0.00653029	-0.00395421
Osteolaemus	tetraspis	AMNH	117802	Dentary	7	Both	11.5328	-0.0303619	0.021042	0.00596101	0.0278912
Osteolaemus	tetraspis	AMNH	117802	Dentary	8	Both	11.6286	0.0206306	0.0156444	0.0155822	-0.022165
Osteolaemus	tetraspis	AMNH	117802	Dentary	9	Both	10.9377	0.064172	0.00643547	0.0192526	-0.0650667
Osteolaemus	tetraspis	AMNH	117802	Dentary	10	Left	16.4265	0.00706607	-0.0108996	-0.0195275	-0.00909229
Osteolaemus	tetraspis	AMNH	117802	Dentary	11	Both	18.5637	0.165172	0.0240423	-0.0315581	-0.162884
Osteolaemus	tetraspis	AMNH	117802	Dentary	12	Both	15.3304	0.289773	-0.0109666	-0.0333909	-0.287021
Osteolaemus	tetraspis	AMNH	117802	Dentary	13	Right	17.0161	0.327567	0.00704881	-0.0289102	-0.323447
Osteolaemus	tetraspis	AMNH	117802	Dentary	14	Both	13.7866	0.341287	0.00753145	-0.0290929	-0.337118
Paleosuchus	palpebrosus	AMNH	93812	Premaxilla	1	Left	13.2115	-0.135507	-0.0282189	-0.00657762	0.133993
Paleosuchus	palpebrosus	AMNH	93812	Premaxilla	3	Left	20.3108	-0.146507	-0.0871601	0.000746163	0.14067
Paleosuchus	palpebrosus	AMNH	93812	Premaxilla	4	Left	19.8439	-0.140296	-0.0333275	-0.0238085	0.136275
Paleosuchus	palpebrosus	AMNH	93812	Premaxilla	5	Both	13.342	-0.0817482	-0.0306142	0.00974072	0.077438
Paleosuchus	palpebrosus	AMNH	93812	Maxilla	1	Right	14.5274	-0.094262	-0.0498512	0.0040597	0.0890027
Paleosuchus	palpebrosus	AMNH	93812	Maxilla	2	Both	15.6791	-0.117499	-0.0144448	0.0128033	0.11406
Paleosuchus	palpebrosus	AMNH	93812	Maxilla	3	Right	24.0191	-0.146899	-0.0259894	0.00729364	0.142924
Paleosuchus	palpebrosus	AMNH	93812	Maxilla	4	Both	26.9911	-0.156699	-0.0194166	0.0074794	0.152193
Paleosuchus	palpebrosus	AMNH	93812	Maxilla	5	Right	10.8186	-0.0725416	0.028498	0.0162171	0.069135
Paleosuchus	palpebrosus	AMNH	93812	Maxilla	6	Both	11.3017	-0.0156207	-0.0336603	0.00975702	0.0111957
Paleosuchus	palpebrosus	AMNH	93812	Maxilla	7	Both	12.9491	0.000881572	-0.0628044	0.0242051	-0.0056968
Paleosuchus	palpebrosus	AMNH	93812	Maxilla	8	Both	15.9515	0.0116436	-0.0248322	0.0162033	-0.014827
Paleosuchus	palpebrosus	AMNH	93812	Maxilla	9	Left	14.8216	0.0860621	-0.0637649	-0.0214221	-0.0926089
Paleosuchus	palpebrosus	AMNH	93812	Maxilla	10	Right	13.1789	0.139224	0.0129291	0.0162569	-0.138666
Paleosuchus	palpebrosus	AMNH	93812	Maxilla	11	Both	12.6645	0.174811	-0.0127559	-0.0126772	-0.175427
Paleosuchus	palpebrosus	AMNH	93812	Maxilla	12	Right	10.9558	0.187057	-0.00640482	0.00805028	-0.185745
Paleosuchus	palpebrosus	AMNH	93812	Maxilla	13	Both	10.3432	0.211231	-0.026586	0.0104123	-0.212344
Paleosuchus	palpebrosus	AMNH	93812	Maxilla	14	Right	9.94327	0.237491	-0.0363832	0.000581274	-0.236907
Paleosuchus	palpebrosus	AMNH	93812	Maxilla	15	Left	9.33742	0.265077	-0.00317683	-0.0103408	-0.264699
Paleosuchus	palpebrosus	AMNH	93812	Dentary	1	Left	21.5113	-0.171848	0.0229077	-0.0202349	0.169787
Paleosuchus	palpebrosus	AMNH	93812	Dentary	2	Right	11.4212	-0.0566377	0.0189061	0.00733223	0.0564601
Paleosuchus	palpebrosus	AMNH	93812	Dentary	3	Left	11.4334	-0.0837487	-0.0119038	0.0207589	0.0802954
Paleosuchus	palpebrosus	AMNH	93812	Dentary	4	Both	20.8506	-0.134145	-0.00707958	0.0198761	0.131479
Paleosuchus	palpebrosus	AMNH	93812	Dentary	5	Left	10.8901	-0.0945952	-0.0198299	0.0112093	0.0909547
Paleosuchus	palpebrosus	AMNH	93812	Dentary	7	Left	9.37624	-0.0715674	0.0176226	0.0159924	0.0686351
Paleosuchus	palpebrosus	AMNH	93812	Dentary	8	Right	7.96354	-0.00408733	-0.00525372	0.0258911	0.00142607
Paleosuchus	palpebrosus	AMNH	93812	Dentary	9	Right	8.59758	-0.021789	-0.00508666	0.00780738	0.0163174
Paleosuchus	palpebrosus	AMNH	93812	Dentary	11	Both	11.0844	-0.0569541	-0.0080938	0.0156211	0.0533642
Paleosuchus	palpebrosus	AMNH	93812	Dentary	12	Left	17.6367	-0.0382622	0.0181701	0.0263964	0.0367832
Paleosuchus	palpebrosus	AMNH	93812	Dentary	13	Left	17.0377	0.0183067	0.0121845	0.0212081	-0.0215144
Paleosuchus	palpebrosus	AMNH	93812	Dentary	14	Both	13.1644	0.0377493	0.00552214	0.00378658	-0.0417124
Paleosuchus	palpebrosus	AMNH	93812	Dentary	15	Both	11.3478	0.0644748	0.00134899	0.0149264	-0.0665707
Paleosuchus	palpebrosus	AMNH	93812	Dentary	16	Both	11.2896	0.124407	0.00696294	0.003412	-0.125734
Paleosuchus	palpebrosus	AMNH	93812	Dentary	17	Both	10.9228	0.154091	0.00587653	-0.00571541	-0.154202
Paleosuchus	palpebrosus	AMNH	93812	Dentary	18	Both	11.4848	0.171311	0.00851879	-0.0026461	-0.171606
Paleosuchus	palpebrosus	AMNH	93812	Dentary	19	Both	11.2228	0.168274	0.0292021	-0.0100815	-0.168064
Paleosuchus	palpebrosus	AMNH	93812	Dentary	20	Both	10.7321	0.193694	0.016275	0.011987	-0.193837
Paleosuchus	palpebrosus	AMNH	93812	Dentary	21	Right	10.3493	0.200889	0.0121159	0.00866183	-0.19973
Paleosuchus	palpebrosus	AMNH	93812	Dentary	22	Left	8.35181	0.253494	-0.0115248	-0.0234304	-0.252978
Paleosuchus	palpebrosus	AMNH	97328	Premaxilla	1	Left	18.4837	-0.160434	0.0163533	-0.0290296	0.159296
Paleosuchus	palpebrosus	AMNH	97328	Premaxilla	4	Left	32.6318	-0.151036	-0.0576129	-0.0170598	0.147863
Paleosuchus	palpebrosus	AMNH	97328	Premaxilla	5	Both	13.3534	-0.139764	0.0385093	0.0198908	0.139577
Paleosuchus	palpebrosus	AMNH	97328	Maxilla	1	Both	14.5574	-0.0425462	-0.0632396	0.00181602	0.0398605
Paleosuchus	palpebrosus	AMNH	97328	Maxilla	2	Right	18.5657	-0.158513	-0.0349051	0.0100506	0.155596
Paleosuchus	palpebrosus	AMNH	97328	Maxilla	3	Right	30.3981	-0.149268	-0.0659347	0.00224472	0.145318
Paleosuchus	palpebrosus	AMNH	97328	Maxilla	4	Right	33.4288	-0.138119	-0.00118088	0.0111403	0.136805
Paleosuchus	palpebrosus	AMNH	97328	Maxilla	5	Left	12.9767	-0.0587711	0.0157915	0.0341882	0.0611074
Paleosuchus	palpebrosus	AMNH	97328	Maxilla	6	Both	14.1305	0.0136903	-0.0590228	0.0312698	-0.0145767
Paleosuchus	palpebrosus	AMNH	97328	Maxilla	7	Left	16.8773	-0.0217429	-0.02926	0.0262181	0.0202729
Paleosuchus	palpebrosus	AMNH	97328	Maxilla	8	Right	17.475	-0.016786	-0.0121011	0.0334859	0.0182126
Paleosuchus	palpebrosus	AMNH	97328	Maxilla	9	Both	17.6407	0.013321	-0.00427643	0.0227075	-0.0138896
Paleosuchus	palpebrosus	AMNH	97328	Maxilla	10	Both	14.742	0.0932715	-0.036466	0.036627	-0.094459
Paleosuchus	palpebrosus	AMNH	97328	Maxilla	11	Both	13.6467	0.144038	0.00344918	0.00561506	-0.143809
Paleosuchus	palpebrosus	AMNH	97328	Maxilla	12	Both	12.5413	0.194678	0.0319646	0.0112031	-0.192863
Paleosuchus	palpebrosus	AMNH	97328	Maxilla	13	Both	12.2742	0.22219	0.00298448	-0.0020266	-0.221428
Paleosuchus	palpebrosus	AMNH	97328	Maxilla	14	Both	11.7267	0.22946	0.0250141	-0.00238958	-0.227707
Paleosuchus	palpebrosus	AMNH	97328	Maxilla	15	Left	8.98735	0.231404	0.0405918	-0.0106152	-0.228033
Paleosuchus	palpebrosus	AMNH	97328	Dentary	1	Right	27.6137	-0.172475	0.106739	-0.00434584	0.175726
Paleosuchus	palpebrosus	AMNH	97328	Dentary	4	Both	32.4541	-0.132677	-0.0111376	0.016825	0.131451
Paleosuchus	palpebrosus	AMNH	97328	Dentary	6	Left	11.2095	-0.14038	0.0303958	0.00801128	0.139516
Paleosuchus	palpebrosus	AMNH	97328	Dentary	11	Right	23.7924	-0.117808	-0.0290358	0.0100705	0.114823
Paleosuchus	palpebrosus	AMNH	97328	Dentary	12	Both	17.3933	-0.00531304	0.0161904	0.00639795	0.00540907
Paleosuchus	palpebrosus	AMNH	97328	Dentary	13	Both	12.9045	0.0449335	0.0027606	0.0241793	-0.045684
Paleosuchus	palpebrosus	AMNH	97328	Dentary	14	Both	11.7201	0.104691	0.00973808	-0.00510468	-0.105081
Paleosuchus	palpebrosus	AMNH	97328	Dentary	15	Both	12.4375	0.128873	-0.0138015	0.00609651	-0.12931
Paleosuchus	palpebrosus	AMNH	97328	Dentary	16	Both	12.9106	0.160983	-0.00156145	0.00306762	-0.162017
Paleosuchus	palpebrosus	AMNH	97328	Dentary	17	Both	11.3108	0.177134	0.0177665	0.0347669	-0.175048
Paleosuchus	palpebrosus	AMNH	97328	Dentary	18	Both	12.0434	0.171635	-0.00627878	0.00109485	-0.171541
Paleosuchus	palpebrosus	AMNH	97328	Dentary	19	Both	12.2157	0.189585	0.0207312	0.0200495	-0.188409
Paleosuchus	palpebrosus	AMNH	97328	Dentary	20	Both	11.3546	0.214676	-0.00160492	0.00124781	-0.214051
Paleosuchus	triganotus	AMNH	58136	Premaxilla	3	Left	31.6879	-0.225452	-0.0210924	-0.00525415	0.221498
Paleosuchus	triganotus	AMNH	58136	Premaxilla	4	Both	30.1723	-0.213074	-0.0607174	0.00458669	0.209434
Paleosuchus	triganotus	AMNH	58136	Premaxilla	5	Left	20.7171	-0.172233	-0.0427702	0.00842956	0.16793
Paleosuchus	triganotus	AMNH	58136	Maxilla	1	Right	16.6894	-0.122634	-0.0139274	-0.0135385	0.118124
Paleosuchus	triganotus	AMNH	58136	Maxilla	2	Left	22.4161	-0.156569	-0.0431648	0.0215336	0.15251
Paleosuchus	triganotus	AMNH	58136	Maxilla	3	Right	31.2633	-0.189627	-0.0475041	0.00461308	0.186377
Paleosuchus	triganotus	AMNH	58136	Maxilla	4	Right	33.4833	-0.190357	-0.0183419	0.00316261	0.187475
Paleosuchus	triganotus	AMNH	58136	Maxilla	5	Left	16.0884	-0.0329565	-0.0180555	0.00298272	0.0298998
Paleosuchus	triganotus	AMNH	58136	Maxilla	7	Both	14.5677	-0.0289613	-0.0107321	0.000352333	0.0256525
Paleosuchus	triganotus	AMNH	58136	Maxilla	8	Right	18.6537	-0.0452895	-0.0319831	0.0324092	0.041574
Paleosuchus	triganotus	AMNH	58136	Maxilla	9	Both	19.252	0.0120043	-0.019691	0.00438181	-0.0133726
Paleosuchus	triganotus	AMNH	58136	Maxilla	11	Both	15.5977	0.0980364	0.0118617	-0.0205733	-0.0975661
Paleosuchus	triganotus	AMNH	58136	Maxilla	12	Both	13.0684	0.206823	-0.000222962	-0.0232349	-0.204659
Paleosuchus	triganotus	AMNH	58136	Maxilla	13	Both	12.7387	0.195733	0.00302039	-0.0419256	-0.193755
Paleosuchus	triganotus	AMNH	58136	Maxilla	14	Left	11.9902	0.219497	-0.0168135	-0.0523605	-0.21782
Paleosuchus	triganotus	AMNH	58136	Maxilla	15	Both	10.0917	0.233038	-0.0177596	-0.0570153	-0.23099
Paleosuchus	triganotus	AMNH	58136	Dentary	1	Left	28.4532	-0.210546	0.0475479	0.00169065	0.2093
Paleosuchus	triganotus	AMNH	58136	Dentary	2	Left	15.2939	-0.0664371	0.0535824	-0.00967867	0.067827
Paleosuchus	triganotus	AMNH	58136	Dentary	3	Both	16.3352	-0.0939564	0.00139136	0.0103413	0.090572
Paleosuchus	triganotus	AMNH	58136	Dentary	4	Both	29.3399	-0.177246	-0.0532648	0.0098275	0.172769
Paleosuchus	triganotus	AMNH	58136	Dentary	5	Left	14.0763	-0.0209977	0.0453001	-0.00463524	0.0212773
Paleosuchus	triganotus	AMNH	58136	Dentary	6	Left	12.562	0.0472832	-0.00520868	0.0124364	-0.0481096
Paleosuchus	triganotus	AMNH	58136	Dentary	7	Right	10.981	0.0160343	0.0472959	-0.00724215	-0.0149752
Paleosuchus	triganotus	AMNH	58136	Dentary	8	Both	11.6346	-0.0286027	-0.0369769	0.0174987	0.0252268
Paleosuchus	triganotus	AMNH	58136	Dentary	9	Both	12.0986	0.00681594	0.0033644	-0.0178378	-0.00839966
Paleosuchus	triganotus	AMNH	58136	Dentary	10	Both	12.6864	-0.028303	-0.0114417	0.000679629	0.0256884
Paleosuchus	triganotus	AMNH	58136	Dentary	11	Left	15.9362	-0.0437262	-0.015646	0.00931134	0.0406279
Paleosuchus	triganotus	AMNH	58136	Dentary	13	Left	21.3926	-0.0473159	0.0136701	0.0147328	0.0465962
Paleosuchus	triganotus	AMNH	58136	Dentary	15	Both	14.3701	0.101322	0.0114405	-0.000233791	-0.101879
Paleosuchus	triganotus	AMNH	58136	Dentary	16	Right	14.0289	0.163048	-0.00151634	-0.0147884	-0.163757
Paleosuchus	triganotus	AMNH	58136	Dentary	17	Left	12.8726	0.238208	0.0261852	-0.0505266	-0.233308
Paleosuchus	triganotus	AMNH	58136	Dentary	18	Both	13.5457	0.216406	0.00820394	-0.040503	-0.214266
Paleosuchus	triganotus	AMNH	58136	Dentary	19	Both	13.1584	0.19987	0.00286684	-0.0487607	-0.197725
Paleosuchus	triganotus	AMNH	58136	Dentary	20	Both	12.9296	0.24852	0.031567	-0.0287527	-0.246006
Paleosuchus	triganotus	AMNH	58136	Dentary	21	Both	11.6522	0.245067	0.0179033	-0.0298968	-0.242721
Paleosuchus	triganotus	AMNH	58136	Dentary	22	Right	7.72899	0.24421	-0.00118259	-0.050178	-0.243037
Paleosuchus	triganotus	AMNH	137174	Maxilla	2	Left	14.1825	-0.0181693	-0.00987261	-0.000943414	0.0175803
Paleosuchus	triganotus	AMNH	137174	Maxilla	3	Both	21.9637	-0.149901	-0.00277974	-0.0211202	0.148581
Paleosuchus	triganotus	AMNH	137174	Maxilla	4	Left	26.4099	-0.173548	-0.0111855	-0.0108544	0.171044
Paleosuchus	triganotus	AMNH	137174	Maxilla	5	Left	14.4697	-0.0964769	-0.026152	-0.0138292	0.0932051
Paleosuchus	triganotus	AMNH	137174	Maxilla	6	Both	11.8464	-0.047785	-0.00881545	-0.00261566	0.0441161
Paleosuchus	triganotus	AMNH	137174	Maxilla	7	Both	12.0997	-0.0143719	0.00232863	-0.018684	0.0118758
Paleosuchus	triganotus	AMNH	137174	Maxilla	8	Left	14.845	-0.00992954	0.000449967	-0.00641806	0.00674152
Paleosuchus	triganotus	AMNH	137174	Maxilla	9	Both	15.5997	-0.00825356	-0.000647104	-0.0214534	0.00557798
Paleosuchus	triganotus	AMNH	137174	Maxilla	10	Both	14.2362	0.0583387	0.00476352	-0.00706587	-0.0604864
Paleosuchus	triganotus	AMNH	137174	Maxilla	11	Both	11.7577	0.119584	-0.00323164	-0.0311219	-0.120706
Paleosuchus	triganotus	AMNH	137174	Maxilla	12	Both	10.7157	0.156708	-0.00352336	-0.0175838	-0.157104
Paleosuchus	triganotus	AMNH	137174	Maxilla	13	Both	10.1415	0.162055	-0.00219449	-0.0295294	-0.161464
Paleosuchus	triganotus	AMNH	137174	Maxilla	14	Left	8.76366	0.191585	-0.0188333	-0.0448885	-0.193183
Paleosuchus	triganotus	AMNH	137174	Maxilla	15	Both	8.77935	0.184208	-0.00716027	-0.0248737	-0.183251
Paleosuchus	triganotus	AMNH	137174	Dentary	1	Left	23.1395	-0.214515	0.0151894	-0.0183231	0.212067
Paleosuchus	triganotus	AMNH	137174	Dentary	5	Left	12.0944	-0.0728118	-0.0201551	-0.0128784	0.0698843
Paleosuchus	triganotus	AMNH	137174	Dentary	6	Left	10.0388	-0.0669332	-0.0195521	0.015488	0.0657277
Paleosuchus	triganotus	AMNH	137174	Dentary	7	Both	9.66615	-0.0137254	0.0145879	-0.0228475	0.0116029
Paleosuchus	triganotus	AMNH	137174	Dentary	8	Left	9.69769	-0.0687226	0.00370864	-0.00234043	0.0650033
Paleosuchus	triganotus	AMNH	137174	Dentary	10	Both	9.48063	-0.0252737	0.0143488	-0.00418283	0.0225637
Paleosuchus	triganotus	AMNH	137174	Dentary	13	Right	17.645	-0.0883171	0.00928061	-0.00826511	0.0859878
Paleosuchus	triganotus	AMNH	137174	Dentary	14	Both	12.7506	-0.0257846	-0.0211702	-0.000150723	0.0235869
Paleosuchus	triganotus	AMNH	137174	Dentary	15	Right	10.924	0.00287881	-0.00301661	-0.0139061	-0.0074604
Paleosuchus	triganotus	AMNH	137174	Dentary	17	Left	11.0808	0.0953546	-0.0056759	-0.0164212	-0.0963756
Paleosuchus	triganotus	AMNH	137174	Dentary	18	Both	10.7181	0.133384	-0.00160573	-0.020483	-0.133439
Paleosuchus	triganotus	AMNH	137174	Dentary	19	Both	11.0505	0.195609	-0.0143462	-0.0150943	-0.194755
Paleosuchus	triganotus	AMNH	137174	Dentary	20	Right	10.4737	0.168065	0.0114931	-0.0494704	-0.166112
Paleosuchus	triganotus	AMNH	137174	Dentary	21	Both	9.28962	0.213719	0.00871243	-0.0258762	-0.211256
Tomistoma	schlegelii	AMNH	113078	Premaxilla	1	Left	35.2371	-0.240572	-0.0346624	-0.0475725	0.236531
Tomistoma	schlegelii	AMNH	113078	Premaxilla	2	Left	47.8489	-0.302585	-0.0610125	-0.0342361	0.296731
Tomistoma	schlegelii	AMNH	113078	Maxilla	4	Left	45.1061	-0.295368	-0.0365922	-0.0251805	0.290844
Tomistoma	schlegelii	AMNH	113078	Maxilla	6	Both	31.7033	-0.240679	-0.018422	-0.0182627	0.237774
Tomistoma	schlegelii	AMNH	113078	Maxilla	8	Right	32.8011	-0.218693	0.00278755	-0.0171883	0.217629
Tomistoma	schlegelii	AMNH	113078	Maxilla	9	Both	29.3342	-0.193463	-0.0343993	-0.00205975	0.190934
Tomistoma	schlegelii	AMNH	113078	Maxilla	10	Both	30.5531	-0.156889	-0.0467175	0.00525455	0.154186
Tomistoma	schlegelii	AMNH	113078	Maxilla	11	Both	32.4484	-0.075342	-0.022807	0.0122837	0.0741535
Tomistoma	schlegelii	AMNH	113078	Maxilla	12	Both	31.0332	-0.0301779	-0.0262821	0.00158137	0.0302171
Tomistoma	schlegelii	AMNH	113078	Maxilla	13	Both	25.7447	0.00387107	-0.0139156	0.0104265	-0.00320682
Tomistoma	schlegelii	AMNH	113078	Maxilla	14	Right	23.6883	0.00467713	0.00501374	0.0126535	-0.00329044
Tomistoma	schlegelii	AMNH	113078	Maxilla	15	Left	22.183	0.0568271	0.00644419	0.00700376	-0.0561494
Tomistoma	schlegelii	AMNH	113078	Maxilla	16	Left	15.1553	0.0886877	-0.0318987	-0.00579781	-0.0897309
Tomistoma	schlegelii	AMNH	113078	Dentary	1	Both	51.026	-0.287629	0.0113834	-0.0319923	0.285055
Tomistoma	schlegelii	AMNH	113078	Dentary	2	Left	27.3513	-0.228304	-0.0218959	-0.0357032	0.226415
Tomistoma	schlegelii	AMNH	113078	Dentary	3	Both	30.1301	-0.270786	-0.0656542	-0.013902	0.26599
Tomistoma	schlegelii	AMNH	113078	Dentary	4	Both	49.0805	-0.279414	-0.0606517	-0.0324442	0.274409
Tomistoma	schlegelii	AMNH	113078	Dentary	5	Both	29.8791	-0.246129	-0.0396206	-0.0290052	0.243705
Tomistoma	schlegelii	AMNH	113078	Dentary	6	Left	29.7663	-0.253727	-0.0374631	-0.0134734	0.250068
Tomistoma	schlegelii	AMNH	113078	Dentary	7	Left	33.9786	-0.248924	-0.0156576	-0.0182183	0.246382
Tomistoma	schlegelii	AMNH	113078	Dentary	8	Left	28.1845	-0.244638	-0.0680219	-0.013152	0.239885
Tomistoma	schlegelii	AMNH	113078	Dentary	10	Both	27.7404	-0.234861	-0.0196354	-0.00851826	0.232183
Tomistoma	schlegelii	AMNH	113078	Dentary	11	Right	28.2438	-0.207187	-0.055045	-0.00806039	0.203682
Tomistoma	schlegelii	AMNH	113078	Dentary	12	Both	31.8381	-0.178003	-0.0260824	-0.00712344	0.175651
Tomistoma	schlegelii	AMNH	113078	Dentary	13	Both	33.6898	-0.152841	-0.038175	-0.00503899	0.150498
Tomistoma	schlegelii	AMNH	113078	Dentary	14	Both	30.8399	-0.1166	0.00476276	0.00864923	0.116775
Tomistoma	schlegelii	AMNH	113078	Dentary	15	Left	27.8194	-0.0841159	-0.0302094	0.0219014	0.0827155
Tomistoma	schlegelii	AMNH	113078	Dentary	16	Left	24.4837	-0.0253961	-0.0286482	0.00187717	0.0222309
Tomistoma	schlegelii	AMNH	113078	Dentary	17	Both	24.6876	0.00122981	-0.061192	0.0193091	-0.00263474
Tomistoma	schlegelii	AMNH	113078	Dentary	18	Both	24.0454	0.0186103	-0.0212824	0.0020861	-0.0195004
Tomistoma	schlegelii	AMNH	113078	Dentary	19	Left	19.1113	0.0626529	-0.0423741	-0.00959609	-0.0650445
